1       **Molecular basis for recognition of the Group A Carbohydrate backbone by the PlyC**  
2                               **streptococcal bacteriophage endolysin**

3  
4       Harley King<sup>1,^</sup>, Sowmya Ajay Castro<sup>2,^</sup>, Juan A. Bueren-Calabuig<sup>3,^</sup>, Amol Arunrao  
5       Pohane<sup>4</sup>, Cynthia M. Scholte<sup>1</sup>, Vincent A. Fischetti<sup>5</sup>, Natalia Korotkova<sup>4,6</sup>, Fabio  
6       Zuccotto<sup>3</sup>, Daniel C. Nelson<sup>1</sup> and Helge C. Dorfmueller<sup>2,\*</sup>

7  
8       <sup>1</sup>Institute for Bioscience and Biotechnology Research, University of Maryland, Rockville, MD,  
9       USA

10       <sup>2</sup>Division of Molecular Microbiology, School of Life Sciences, University of Dundee, Dundee, UK

11       <sup>3</sup>Drug Discovery Unit, Wellcome Centre for Anti-Infectives Research, Division of Biological  
12       Chemistry, School of Life Sciences, University of Dundee, Dundee, UK

13       <sup>4</sup>Department of Microbiology, Immunology and Molecular Genetics, University of Kentucky,  
14       Lexington, Kentucky, USA

15       <sup>5</sup>Laboratory of Bacterial Pathogenesis and Immunology, The Rockefeller University, New York,  
16       NY, USA

17       <sup>6</sup>Department of Molecular and Cellular Biochemistry, University of Kentucky, Lexington, KY, USA

18  
19       <sup>^</sup>equal contribution

20       <sup>\*</sup>Correspondence: Helge C. Dorfmueller, [h.c.z.dorfmueller@dundee.ac.uk](mailto:h.c.z.dorfmueller@dundee.ac.uk)

21       Keywords: Streptococcus; rhamnose, polysaccharide, cell wall, bacteriophage, endolysin,  
22       pyogenes

23

24

25

26

27 **Abbreviations (alphabetical order)**

28 Cell wall-binding domain (CBD), enzymatically active domain (EAD), Glucose (Glc), glycerol  
29 phosphate (GroP), Glycosyl Hydrolase (GlyH), Group A Carbohydrate (GAC), Group A  
30 Streptococcus (GAS), Group A-variant Streptococcus (GAVS), Group C Carbohydrate (GCC),  
31 Group C Streptococcus (GCS), Group G Carbohydrate (GGC), *N*-acetyl-glucosamine (GlcNAc),  
32 *N*-acetyl-galactosamine (GalNAc), *N*-acetyl-muramic acid (MurNAc), Peptidoglycan (PG),  
33 polyrhamnose (pRha), Rhamnose (Rha), *S. dysgalactiae subsp. equisimilis* (SDSE), *S. mutans*  
34 serotype c carbohydrate (SCC)

35

36

37 **Abstract**

38

39 Endolysins are peptidoglycan (PG) hydrolases that function as part of the bacteriophage  
40 (phage) lytic system to release progeny phage at the end of a replication cycle. Notably,  
41 endolysins alone can produce lysis without phage infection, which offers an attractive alternative  
42 to traditional antibiotics. Endolysins from phage that infect Gram-positive bacterial hosts contain  
43 at least one enzymatically active domain (EAD) responsible for hydrolysis of PG bonds and a  
44 cell wall binding domain (CBD) that binds a cell wall epitope, such as a surface carbohydrate,  
45 providing some degree of specificity for the endolysin. Whilst the EADs typically cluster into  
46 conserved mechanistic classes with well-defined active sites, relatively little is known about the  
47 nature of the CBDs and only a few binding epitopes for CBDs have been elucidated. The major  
48 cell wall components of many streptococci are the polysaccharides that contain the  
49 polyrhamnose (pRha) backbone modified with species-specific and serotype-specific glycosyl  
50 side chains. In this report, using molecular genetics, microscopy, flow cytometry and lytic activity  
51 assays, we demonstrate the interaction of PlyCB, the CBD subunit of the streptococcal PlyC  
52 endolysin, with the pRha backbone of the cell wall polysaccharides, Group A Carbohydrate  
53 (GAC) and serotype *c*-specific carbohydrate (SCC) expressed by the Group A *Streptococcus*  
54 and *Streptococcus mutans*, respectively. Molecular dynamics simulations reveal a previously  
55 unidentified binding pocket that is regulated by a gatekeeper residue and uncover that a  
56 previously reported inactive PlyC mutant is locked into a 'closed' conformation. Docking studies  
57 with the short GAC backbone oligosaccharides expose potential protein-carbohydrate  
58 interactions and are consistent with PlyCB binding to the unmodified pRha or pRha decorated  
59 with the GAC side chains.

60

## 61 **Introduction**

62 Endolysins are bacteriophage-encoded PG hydrolases that normally function from within the cell  
63 to lyse the bacterial host, releasing progeny phage and completing the phage lifecycle [1].  
64 However, the lytic activity of endolysins can be harnessed for antimicrobial use due to their  
65 ability to equally lyse bacteria when applied exogenously, without infection by a parental phage.  
66 Due to their direct lytic action on target PG, endolysins are not affected by efflux pumps,  
67 alterations in metabolism, or other mechanisms of antibiotic resistance, making them ideal  
68 candidates for development against multi-drug resistant organisms [2-4]. Notably, at least three  
69 endolysins, some of which are active against methicillin-resistant *Staphylococcus aureus*, are  
70 currently being evaluated in human clinical trials for their antimicrobial activity (reviewed in [5]).

71  
72 Most endolysins, and in particular those from phage that infect Gram-positive bacterial hosts,  
73 are comprised of modular domains. An enzymatically active domain (EAD) is generally found in  
74 the N-terminal region, while a cell wall-binding domain (CBD) is located in the C-terminal region  
75 [6]. As the name implies, the EAD is a catalytic domain that is responsible for cleaving specific  
76 bonds in the PG, the nature of which is dependent on the mechanistic class of the EAD.  
77 Occasionally, endolysins contain two EADs, although both are not necessarily active. The CBD  
78 binds at high affinity [7] to a cell wall-specific epitope and was suggested to dictate genus,  
79 species and serovar-specificity of the endolysin. The CBD targets may be surface  
80 carbohydrates, wall teichoic acids linked to the Gram-positive bacterial cell wall, or the PG itself  
81 [8].

82  
83 The endolysin now known as PlyC is one of the first described endolysins and remains one of  
84 the most studied. In 1934, Alice Evans noted a “nascent lysis” activity derived from  
85 streptococcal phage lysates on streptococcal strains that were not sensitive to the phage itself  
86 [9]. By 1957, Krause had determined that the phage used by Evans was specific for Group C

87 Streptococci (GCS), but an “enzyme” produced by the phage could lyse Groups A, A-variant,  
88 and C Streptococci (GAS, GAVS, and GCS, respectively) [10]. These findings were confirmed  
89 by Maxted later the same year and extended to include Group E Streptococci (GES) [11]. In  
90 2001, PlyC, then referred to as the streptococcal C<sub>1</sub> lysin, became the first endolysin to be used  
91 therapeutically, protecting mice from GAS challenge in a nasopharyngeal model [2].  
92 Subsequent studies revealed that PlyC is a structurally unconventional endolysin, which is not  
93 encoded by a single gene as found for all other endolysins described to date. Rather, PlyC is a  
94 nine-subunit holoenzyme encoded by two distinct genes, *plyCB* and *plyCA*, within a  
95 polycistronic operon [12]. Eight PlyCB subunits self-assemble into a ring structure and form the  
96 basis of the CBD that binds the streptococcal surface. A single PlyCA subunit contains two  
97 distinct EADs separated by an extended  $\alpha$ -helical linker region, which interfaces with the N-  
98 terminal residues of the PlyCB octamer [13]. The PlyCA EADs consist of a glycosyl hydrolase  
99 (GH) domain and a cysteine, histidine-dependent aminohydrolase/peptidase (CHAP) domain.  
100 The very high lytic activity of PlyC relative to other endolysins is attributed to  
101 synergy/cooperativity between the two EADs.

102

103 Although the EADs of PlyCA have been extensively characterized with respect to specificity of  
104 PG bonds they cleave, active-site residues, and their synergistic activity, it is unclear how PlyCB  
105 recognizes PG of GAS, GCS and GES. Similar to other Gram-positive bacteria, the plasma  
106 membrane of streptococci is surrounded by thick cell wall that consists of a complex network of  
107 PG with covalently attached polysaccharides. Rebecca Lancefield utilized the unique  
108 immunogenicity of the surface carbohydrates in  $\beta$ -hemolytic streptococci to subsequently  
109 separate them into serogroups [14]. *S. pyogenes* is categorized as Group A Streptococcus,  
110 whilst *S. dysgalactiae subsp equisimilis* (SDSE) produce at least two types of carbohydrates  
111 and are annotated as Group C and G Streptococci, respectively [15]. Pioneering work by many  
112 researchers have revealed that the cell wall polysaccharides of GAS, GCS and *S. mutans*,

113 consist of a pRha backbone modified with species-specific and serotype-specific glycosyl side  
114 chains (Fig. 1A) [16, 17]. In GAS, GCS and *S. mutans* serotype *c*, the polysaccharides termed  
115 the Lancefield group A carbohydrate (GAC), group C carbohydrate (GCC), and SCC,  
116 respectively, have a conserved repeating  $\rightarrow 3)\alpha\text{-Rha}(1\rightarrow 2)\alpha\text{-Rha}(1\rightarrow$  di-saccharide backbone  
117 [16, 17]. The  $\beta\text{-N-acetylglucosamine}$  (GlcNAc) side chains are attached to the 3-position of the  
118  $\alpha\text{-1,2}$  linked rhamnose (Rha) in GAC [16, 18, 19]. The GCC side chains have two *N-acetyl-*  
119 *galactosamine* (GalNAc) residues attached to the same hydroxyl of Rha [16, 18, 20]. SCC  
120 carries the  $\alpha\text{-glucose}$  (Glc) side chains attached to the 2-position of the  $\alpha\text{-1,3}$  linked Rha in SCC  
121 [17]. Additionally, the side chains of GAC and SCC are decorated in parts with the glycerol  
122 phosphate (GroP) moiety [21]. The GAC and SCC biosynthetic pathways are encoded by the  
123 12-gene loci *gacABCDEFGHIJKL* and *sccABCDEFGHMPQ*, respectively. The molecular  
124 mechanisms of GAC and SCC biosynthesis have been the focus in a number of recent studies  
125 [21-25].

126  
127 Remarkably, extracted GAC is known to partially inhibit the lytic actions of PlyC [26].  
128 Furthermore, a GAS mutant carrying the unmodified GAC (lacking the GlcNAc side chains)  
129 displayed enhanced susceptibility to PlyC [25], implicating PlyCB in recognition of the pRha  
130 backbone. Here, we identify the pRha backbone of GAC as the definite minimal binding epitope  
131 for PlyCB. Molecular dynamics simulations and docking studies based on our findings further  
132 establish a model of interaction between PlyCB and selective surface carbohydrates in  
133 streptococci.

134

## 135 **Materials and Methods**

### 136 **Bacterial strains, growth conditions and media**

137 *Streptococcus pyogenes* strain D471 was propagated on solid media in plates containing Todd-  
138 Hewitt broth supplemented with yeast extract (0.2%) (THY) and agar (1.4%) or in liquid THY as

139 described by Gera et al [27]. *S. mutans* wild type (Xc) and mutants were grown in Todd-Hewitt  
140 broth with 1% yeast extract. All cultures were grown without antibiotics and without aeration at  
141 37°C. *E. coli* genotypes DH5 $\alpha$  (NEB, cat. No. C2988J), DH10 $\alpha$  (Thermo Fisher, cat No.  
142 18297010), BL21 (NEB, cat No. C2530H) and Origami 2 (Millipore Sigma, cat. No. 71346) were  
143 used for routine plasmid propagation or protein expression and grown in Lysogeny Broth (LB)  
144 medium supplemented with either 50  $\mu$ g/ml kanamycin, 100  $\mu$ g/ml ampicillin or 35  $\mu$ g/ml  
145 chloramphenicol as needed.

146

147 Bacterial strains *E. coli* CS2775 were transformed with pRGP1 plasmid [28], *gacABCDEFG* [23]  
148 to produce pRha or empty plasmid control (pHD0131). The bacterial cells were grown overnight  
149 in LB containing erythromycin (150  $\mu$ g/ml) at 37°C and used next day for whole cell Western  
150 blots and FACS and microscopy analysis.

151

## 152 **Recombinant expression and purification of PlyCB<sub>WT</sub> and PlyCB<sub>R66E</sub>**

153 PlyCB<sub>WT</sub> (GenBank ID: NC\_004814.1:7517-7735) was expressed from a pBAD24 vector and  
154 purified from BL21 cells as previously described [12]. In brief, the culture was grown in LB and  
155 induced with 0.25% L-arabinose at OD<sub>600</sub> ~1.2-1.4 (Alfa Aesar, cat no. A11921). Cultures were  
156 grown at 37°C with shaking at 180 RPM for 3-4 hours, centrifuged at 4500 x g and resuspended  
157 in phosphate-buffered saline (PBS). Lysis was performed by a French press (1800 psi).  
158 Benzonase (Millipore Sigma, cat. No. 70746-3) was added and the lysate incubated at room  
159 temperature with rotation for 20-30 min. The lysate was centrifuged at 20,000 x g for 20 min and  
160 the cleared lysate was passed through a 0.45- $\mu$ m filter and loaded onto a XK-26/20 column  
161 (Cytiva) with 30-35 ml ceramic hydroxyapatite (Bio-Rad, cat no. 1582000). PlyCB<sub>WT</sub> was eluted  
162 from the column with three column volumes of 1 M sodium phosphate buffer (pH 7.2). Protein  
163 was subsequently dialyzed in PBS, 10% glycerol and stored at -80°C until use. Protein  
164 purification of PlyCB<sub>R66E</sub> was performed as PlyCB<sub>WT</sub> [13]. The fluorescent labeling of PlyCB<sub>WT</sub>

165 and PlyCB<sub>R66E</sub> was performed using the manufacturer's recommended guidelines (Thermo  
166 Fisher, cat. No. A20174).

167

### 168 **Purification of GAC**

169 GAS were grown overnight in THY media at 37°C. Cultures were centrifuged at 4,500 x g.  
170 Pellets were washed and resuspended in 40 ml distilled water per each original liter of media  
171 used and combined in an 800 ml beaker. 22.5 ml 4N sodium nitrite (5 ml per liter of culture) was  
172 added to the beaker in addition to 22.5 ml glacial acetic acid (5 ml per liter of culture). An orbital  
173 shaker was used to gently mix the beaker for 15 min in a hood. The mixture was centrifuged in  
174 500 ml bottles at 8000 x g for 15 min. The supernatant was decanted to a new beaker and  
175 neutralized with 1M sodium hydroxide. The total solution, about 300 ml, was filtered with a 0.45-  
176 micron filter assembly. 50-50 ml aliquots were deposited in a 3.5 kDa membrane and dialyzed in  
177 a 4-liter beaker overnight with water. The following day, the solution was concentrated using an  
178 Amicon 400 ml stirred cell (model 8400) filter assembly with a 76 mm diameter Ultracel® 5 kDa  
179 ultrafiltration disc (Millipore Sigma, cat. No. PLCC07610) for 2 hours with 60 psi. The ~10 ml  
180 concentrate was loaded onto an S-100 column for final purification. Fractions were assayed for  
181 Rha, lyophilized and stored at 4°C until use.

182

### 183 **Calculation of pRha concentration**

184 A modified protocol by Edgar *et al.* [21] based on a protocol from DuBois *et al.* [29] was used to  
185 determine Rha concentration in purified GAC. Briefly, anthrone reagent was prepared by  
186 dissolving 0.2% w/w anthrone in H<sub>2</sub>SO<sub>4</sub>. Eighty microliters of aqueous samples or standards  
187 containing either GAC or L-Rha at known concentrations were added to a 1.5 ml microfuge  
188 tube. To this same tube, 320 µL of the anthrone reagent was added. Samples were boiled at  
189 98°C for 10 min in a heat block. Samples were cooled to room temperature, transferred to a



190 quartz plate, and the absorbance at 580 nm was recorded using a spectrophotometer. Rha  
191 concentration was interpolated using an L-Rha standard curve.

192

### 193 **Precipitation of PlyCB with GAC**

194 PlyCB<sub>WT</sub> and PlyCB<sub>R66E</sub> samples were defrosted from storage at -80°C. Lyophilized GAC was  
195 resuspended in PBS. Both proteins and GAC were added to a 3.5 kDa dialysis membrane and  
196 dialyzed overnight in PBS. Protein concentrations were determined using a NanoDrop  
197 spectrophotometer (Thermo Fisher ND-2000) at 280 nm and were diluted to 5 mg/ml. The GAC  
198 was also assayed and diluted with PBS to 1.6 mg/ml. One-hundred microliters of proteins and  
199 100 µl of GAC or PBS were mixed in a 250 µl quartz plate and allowed to incubate without  
200 shaking at room temperature. Visible precipitate formed in samples in 5-8 minutes. After  
201 recording the precipitate at 340 nm using a Spectramax® M5 (Molecular Devices)  
202 spectrophotometer, the total sample volume was transferred to a 1.5 ml microfuge tube.  
203 Samples were centrifuged at 14,000 x g to pellet the precipitate and supernatants were  
204 transferred to new 1.5 ml microfuge tubes. Two-hundred microliters of 8M urea was added to  
205 the pellet. Pellets were resuspended and 5 µl of either pellet or supernatant were added to 40 µl  
206 water with 8 µl 6x Laemmli buffer with DTT. Samples were boiled at 98°C for 8 min, and then  
207 12.5 µl were loaded onto a 7.5% SDS-PAGE and run for 32 min at 200V. Proteins were  
208 visualized using Coomassie stain.

209

### 210 **Lysis assay**

211 A turbidity reduction assay was used to ascertain strain sensitivity to PlyC. This assay was  
212 performed as previously described [30], except PlyC was used at 2 µM. Eight technical  
213 replicates were performed.

214

215 Sensitivity of streptococcal species to PlyC-mediated lysis was analyzed using a wide range of  
216 clinical isolates: 1) GAS isolates: M1<sub>UK</sub>, WT 5448 strain [M1], *delta**gacI* 5448 strain [*dgacI*]; 2)  
217 GCS isolate: stC74A.0; 3) SDSE\_*gac* isolates: stG245.0, stG652.0, stG485.0; GGS: stG6.0,  
218 stG485.0 and 4) *S. mutans* serotype c were used as negative controls. Briefly, all streptococcal  
219 strains were grown in THY at 37°C overnight in 5% CO<sub>2</sub>, except for *S. mutans*, which was grown  
220 in THB media. Next day, the bacterial cells were inoculated in 1:100 fresh media and grown until  
221 mid-logarithmic phase (OD<sub>600</sub> 1.0). The cells were washed in PBS and resuspended to an OD<sub>600</sub>  
222 of 2.0. In a 96-well plate, to a 100 µl of bacterial cells, 100 µl of PlyC [1 µg/ml] was added and  
223 immediately read at an absorbance of OD<sub>600</sub>. The obtained values were standardized by  
224 subtracting from the background values. The data is plotted using GraphPad Prism version 9.

225

## 226 **SDS-PAGE and blotting analysis**

227 PlyCB<sub>WT</sub> binding to recombinant *E. coli* expressing pRha was conducted using blot analysis.  
228 Briefly, the lysate from the overnight cultures was analyzed in 20% tricine gels. SDS-PAGE and  
229 protein transfers were performed according to manufactures instructions, Atto Ae-6050 Mini Gel  
230 chamber and Novex protein separation from Thermo Fisher, respectively. The PVDF  
231 membranes were blocked with 5% non-fat dry milk with Tris-Buffered Saline, 0.1% Tween® 20  
232 detergent prior to incubation with PlyCB<sub>WT</sub> labelled with Alexa Fluor® 647 (1:1000) for one hour  
233 at room temperature. Goat anti-rabbit GAC antibodies conjugated with IRDye® 800CW were  
234 used as a positive control (abcam ab216773). The resulting blots were imaged using the Licor  
235 Odyssey FC Imaging System. All the blots were processed in parallel under the same  
236 conditions.

237

## 238 **Microscopy**

239 Microscopic analysis of *E. coli* bacteria was performed using cells that were grown overnight in  
240 LB supplemented with antibiotics at 37°C and diluted 1:100 the next day and regrown until

241 OD<sub>600</sub> reached 0.5. The cells were washed twice with PBS for 5 min at 10,000 rpm and stained  
242 with 1:1000 dilution of PlyCB<sup>AF647</sup> and left for 20 minutes on ice in the darkness. Prior to fixing  
243 the cells with 4% paraformaldehyde, the cells were washed again with PBS. The fixed cells  
244 were mounted on 1% agarose coated microscopic slides and viewed under the CY5 channel on  
245 a fluorescent Deltavision widefield microscope.

246

### 247 **FACS analysis**

248 *E. coli* cells were grown overnight as described above and diluted 1:100 the next day, grown at  
249 37°C and used for the assay at OD<sub>600</sub> = 0.5. The cells were washed with PBS and probed with  
250 PlyCB<sup>AF647</sup> or PlyCB<sub>R66E</sub><sup>AF645</sup> at 1:1000 dilution at 1:1000 dilution. Anti-GAC antibodies  
251 conjugated with FITC (ABIN238144, antibodies-online, titer 1:50) were used as a positive  
252 control. The samples were incubated for 20 minutes on ice at dark conditions. The cells were  
253 washed twice with PBS at 14,000 rpm for 5 minutes and fixed with 4% paraformaldehyde. BD  
254 LSRFortessa Flow Cytometry software was used to analyse the samples and the data  
255 interpretation was conducted with FlowJo™ software v10.6.2.

256

### 257 **PlyC hydrolysis of sacculi**

258 *S. mutans* wild-type (WT) and the mutant strain sacculi were obtained by the SDS-boiling  
259 procedure [25] followed by four washes each with 1 M NaCl and distilled water. The sacculi  
260 were resuspended in PBS to OD<sub>600</sub> of 1.0 and incubated with PlyC (5 µg/ml) in a 96-well plate.  
261 The lysis was monitored after 10, 20, 30, 40, 50 and 60 min as a decrease in OD<sub>600</sub>. Results  
262 were reported as fold change in OD<sub>600</sub> of the sacculi incubated with PlyC vs the sacculi  
263 incubated without PlyC.

264

### 265 **Molecular Dynamics**

266 Monomers of PlyCB<sub>WT</sub> (PDB 4F87) and the PlyCB<sub>R66E</sub> mutant (PDB 4ZRZ) were simulated by  
267 Molecular Dynamics (MD). The systems for MD simulations were prepared with the utility LEaP,  
268 which is integrated in the suite of programs AMBER 16 [31]. The ff14SB force field [32] was  
269 used. The N- and C-termini of the proteins were capped with an acetyl (ACE) and methylated  
270 amino group (NME), respectively. Each simulated system was immersed in a water box (TIP3P  
271 water model) and neutralized by adding the appropriate number of counterions. This was  
272 followed by steepest-descent energy minimization to remove steric clashes. MD simulations  
273 were performed using the pmemd.cuda module of AMBER 16. The cut-off distance for the non-  
274 bonded interactions was set to 10Å. The periodic boundary conditions were used. Electrostatic  
275 interactions were treated using the smooth particle mesh Ewald method [33]. The SHAKE  
276 algorithm was applied to all bonds involving hydrogen atoms, and a time step of 2 fs was used  
277 throughout [34]. Each energy minimized system was heated to 300K, equilibrated for 10 ns, and  
278 further simulated for 2  $\mu$ s without any restraints. Protein structures and MD trajectories were  
279 visually inspected and analyzed using the molecular visualization programs PyMOL [35] and  
280 VMD [36].

281

## 282 **Binding cavity identification and druggability assessment**

283 The site recognition software SiteMap, implemented in the Schrodinger suite of programs [37],  
284 was used to investigate the cavities on the PlyCB wild type (PDB 4F87) and R66E mutant (PDB  
285 4ZRZ) proteins surface, in terms of physicochemical properties (hydrophobic/hydrophilic  
286 nature), volume, exposure, and enclosure. Based on those properties, an overall “SiteScore”  
287 was generated providing an estimate value of the druggability of the pocket. Using the default  
288 settings, scores of  $\geq 0.8$  define the limit between drug-binding and non-drug-binding cavities.

289

## 290 **Molecular docking**

291 A low energy 3D conformation of Rha di- and tri-saccharides was generated using LigPrep in  
292 the Schrödinger platform [37]. The binding of the ligands in the Y28 gated cavity identified by  
293 MD in the wild-type structure was evaluated by molecular docking. The program Glide [37], part  
294 of the Schrodinger platform, was used in extra-precision mode with post-docking minimization.  
295 No distance or hydrogen-bond constraints were applied. A 20Å cubic box centered on the  
296 centroid of the residues Leu9, Phe10, His11, Thr12, Ser17, Tyr20 and Ile34 was used to  
297 generate the docking grid. The default settings were modified to increase the conformational  
298 sampling of rings by increasing the energy window to 6.0 kcal/mol.

299

## 300 **Results & Discussion**

301

### 302 **Pathogenic streptococci producing the GAC are susceptible to PlyC**

303 A major component of the GAS cell wall is the GAC, building approximately 50% of the cell wall  
304 by weight [38]. The GAC is universally conserved amongst all isolated GAS strains on the basis  
305 of the gene cluster sequence conservation [39]. A number of *S. dysgalactiae subsp. equisimilis*  
306 (SDSE) isolates, naturally belonging to Group G Streptococci (GGS), have been reported to  
307 have undergone homologous recombination and replaced their Group G Carbohydrate (GGC)  
308 gene cluster in parts with the GAC gene cluster [40-42]. We therefore expanded the previously  
309 reported PlyC streptococci cell lysis assay used by Nelson *et al.* [2] to investigate those new  
310 isolates named SDSE\_*gac*. We also tested if PlyC was able to lyse a selection of GAS  
311 serotypes including a newly emerged isolate M1<sub>UK</sub> [43], and included negative controls GGS  
312 isolates and *S. mutans* serotype C (Fig. 1B). In agreement with the published literature, all  
313 tested GAS serotypes are susceptible to PlyC lysis and the two GGS isolates are resistant to  
314 PlyC. The GGC does not contain the GAC, GCC and SCC pRha backbone with →3)α-  
315 Rha(1→2)α-Rha(1→ di-saccharide repeats, but an alternating Rha-GalNAc carbohydrate [44]  
316 (Fig. 1A). All three SDSE\_*gac* isolates tested have inherited parts of the *gac* gene cluster and

317 produce the GAC instead of the GGC [41]. Strikingly, the SDSE\_*gac* strains are all sensitive to  
318 PlyC treatment. The fact that PlyC is able to lyse SDSE\_*gac* strains that express the GAC, but  
319 PlyC does not lyse the isogenic GGS strains producing the GGC strongly suggests that the  
320 GAC is a critical component of PlyC recognition and subsequent activity.

321  
322 Importantly, all strains tested in this study that are susceptible to PlyC lysis produce a cell wall  
323 polysaccharide that contains the pRha backbone and a  $\beta$ -linked sugar substituent on the  $\alpha$ 1,2-  
324 linked Rha (Fig 1A). We therefore suggest that the pRha backbone with and without a side  
325 chain are both vital ligands to assist PlyC activity and the new SDSE\_*gac* isolates will also be  
326 susceptible to PlyC treatment due to production of the GAC.

327

### 328 **Purified GAC precipitates PlyCB - but not PlyCB<sub>R66E</sub>**

329 The lysis assay of GAS cells, and in particular of the SDSE\_*gac* variants, suggests that either  
330 the ubiquitous pRha or GAC in GAS cells is the ligand for PlyCB. We propose that the PlyCB  
331 octameric CBD binds GAC and/or the GAC pRha backbone. We tested this hypothesis by  
332 investigating the binding of PlyC to partially purified GAC. We hypothesized if the GAC was able  
333 to precipitate PlyCB, an interaction of the two systems must have occurred [45]. As a negative  
334 control, we employed the previously published inactive mutant PlyCB<sub>R66E</sub>, which lost the ability  
335 to bind to GAS cells [13]. The purified proteins were incubated with the extracted GAC, and  
336 precipitation was monitored at 340 nm, a standard wavelength for measuring protein  
337 aggregation [46, 47] (Fig. 2A, B). Whilst keeping the PlyCB concentration constant, we varied  
338 the concentration of GAC. Within five minutes at room temperature the solution became turbid,  
339 suggesting aggregation (Fig. 2A). When the PlyCB concentration was kept constant and the  
340 GAC concentration was varied, the turbidity correlated with PlyCB concentration in a dose  
341 dependent manner, suggesting that PlyCB requires GAC to aggregate. Importantly, PlyCB did  
342 not self-aggregate when no GAC was added in the assay. Furthermore, no aggregation was

343 detected when PlyCB<sub>R66E</sub> was incubated with purified GAC (Fig. 2B). To demonstrate the  
344 presence of PlyCB in the precipitates, we analyzed the soluble and pellet fractions (Fig. 2C, D).  
345 A higher yield of aggregated PlyCB was found in the pelleted samples when compared to the  
346 soluble fraction (Fig. 2D). A similar precipitation effect was observed when we varied the PlyCB  
347 concentration and kept the GAC concentration constant (Fig. 2E, F), demonstrating that both  
348 species are necessary for an interaction.

349  
350 When the L-Rha monosaccharide was mixed with PlyCB, no precipitation was observed,  
351 suggesting that the GAC, or a moiety within the GAC, is a specific ligand required for PlyCB  
352 precipitation.

353

#### 354 **PlyCB binds to recombinantly produced pRha backbone**

355 The purified GAC from bacteria contains a mixture of carbohydrates, including the fully  
356 decorated GAC with GroP[21] and a small proportion of the polysaccharide lacking the side  
357 chains [48]. PlyC is able to lyse a number of GAS mutants including GAVS and *dgacI\_M1* [2,  
358 11, 25, 49], that decorate the cell wall with the unmodified GAC lacking the side chains (Fig. 1A,  
359 B), suggesting that the pRha backbone of the GAC is the minimal carbohydrate structure  
360 required for PlyCB binding. To test this hypothesis, we recombinantly produced the pRha  
361 backbone in *E. coli* cells. We and others have previously reported that the *S. mutans*  
362 *sccABCDEFGF* gene cluster, when transformed into *E. coli* cells, functionally produces the pRha  
363 backbone attached to the lipid A [23, 28]. Additionally, to understand if PlyCB recognizes a  
364 specific pRha backbone, we engineered *E. coli* cells expressing the GAC gene cluster  
365 *gacABCDEFGF* required for the GAC pRha production. *E. coli* cells carrying an empty plasmid  
366 were used as a negative control.

367

368 Next, we investigated the binding of PlyCB conjugated with Alexa Fluor® 647 (PlyCB<sup>AF647</sup>) to an  
369 *E. coli* total cell lysate expressing the pRha backbone of the SCC or GAC, respectively (Fig.  
370 3A). The blotted membranes were incubated with PlyCB<sup>AF647</sup>, and a positive interaction between  
371 PlyCB<sup>AF647</sup> and the *E. coli* produced pRha is visualized as a prominent band around 40 kDa.  
372 The size of the band agrees with the band detected by anti-GAC antibodies that were previously  
373 reported to recognize pRha [23] (Fig. 3B). Importantly, PlyCB<sup>AF647</sup> and GAC antibodies do not  
374 interact with the cell lysate of *E. coli* expressing an empty plasmid (Fig. 3 A, B). We further  
375 confirmed the ability of PlyCB to bind to *E. coli* cells decorated with the pRha by fluorescent  
376 microscopy (S. F1). Only cells that produce the pRha are detected by the PlyCB<sup>AF647</sup>, in  
377 agreement with the results of the blot analysis.

378  
379 To gather additional evidence that PlyCB interacts with the pRha backbone, we established a  
380 flow cytometry assay to analyse the binding of PlyCB<sup>AF647</sup> to pRha-producing *E. coli*. Unstained  
381 *E. coli* cells that express pRha or carry an empty plasmid sort in the identical range (Fig. 4A).  
382 The GAC antibodies label exclusively the cells producing pRha (Fig. 4A). A similar pattern of the  
383 GAC antibodies binding is observed when the cells were incubated with PlyCB<sup>AF647</sup> (Fig. 4B).  
384 Contrary, the PlyCB<sub>R66E</sub><sup>AF645</sup> mutant protein does not bind to *E. coli* cells, and PlyCB<sup>AF647</sup> does  
385 not interact with the cells expressing an empty vector (Fig. 4B). Taken together, these data  
386 provide the first definitive evidence that the pRha backbone of GAC and SCC is a binding  
387 receptor of the PlyCB octameric subunit.

388

### 389 **PlyC lyses engineered *S. mutans* producing the GAC**

390 Despite the fact that the SCC pRha backbone is identical to the GAC, *S. mutans* is resistant to  
391 PlyC lysis (Fig. 1A). To get a better understanding why *S. mutans* is resistant to PlyC, we  
392 compared PlyC-induced lysis of the sacculi purified from *S. mutans* WT and a number of mutant  
393 strains producing different SCC variants (Fig. 5). First, we examined the  $\Delta sccH$  mutant



394 producing the GroP-deficient SCC [21]. Similar to *S. mutans* WT,  $\Delta sccH$  was resistant to PlyC-  
395 mediated lysis (Fig. 5). Second, we tested the *sccN* deletion mutant,  $\Delta sccN$ , that is deficient in  
396 the enzyme required for generation of the Glc side chains [50]. A time dependent lysis is  
397 observed for  $\Delta sccN$ . Expression of the WT copy of *sccN* in  $\Delta sccN$  (the  $\Delta sccN$ :*psccN* strain) fully  
398 restored the resistance of the bacteria to PlyC (Fig. 5). These observations clearly suggest that  
399 PlyC is able to bind to the *S. mutans* cells producing the unmodified pRha backbone, and the  
400 Glc side chains in SCC hinders PlyC binding. We then investigated whether the addition of the  
401 GAC GlcNAc side chains to the pRha backbone affects sensitivity of the engineered *S. mutans*  
402 sacculi to PlyC-induced lysis. We expressed the GAS genes *gacHIJKL* required for the  
403 formation and addition of the GlcNAc side chains and GroP to GAC [21], in the  $\Delta sccN$   
404 background strain in two versions, creating the  $\Delta sccN$ :*pgacHI\*JKL* and  $\Delta sccN$ :*pgacHIJKL*  
405 strains [50]. The plasmid *pgacHI\*JKL* contains an inserted stop codon in the *gacI* gene required  
406 for generation of the GlcNAc side chain, and, therefore, the  $\Delta sccN$ :*pgacHI\*JKL* strain produces  
407 the unmodified SCC lacking any side chains (Fig. 5). As expected, the sacculi isolated from this  
408 strain remains susceptible to PlyC lysis. We previously showed that in  $\Delta sccN$ :*pgacHIJKL*, the  
409 Glc side chains are replaced with the GlcNAc side chains [50]. Interestingly, expression of  
410 *gacHIJKL* in  $\Delta sccN$  did not restore the resistance of the bacteria to PlyC (Fig. 5), indicating that  
411 the GlcNAc side chains do not obstruct PlyC binding. Lastly, we analyzed PlyC-mediated lysis  
412 of sacculi purified from the  $\Delta rgpG$  mutant, which is deficient in SCC expression [50]. The RgpG  
413 protein catalyzes the first step in SCC biosynthesis [51]. In comparison to  $\Delta sccN$ , PlyC-induced  
414 lysis of  $\Delta rgpG$  was less pronounced (Fig. 5), indicating the importance of the pRha backbone of  
415 SCC in PlyC activity and supporting the findings that the pRha backbone is a ligand contributing  
416 to PlyC binding. These studies reveal that if the SCC is 'unmasked' *i.e.*, stripped of the Glc and  
417 Glc-GroP side chains, it becomes a ligand for PlyCB and that *S. mutans* is PlyC susceptible if  
418 SCC is replaced with GAC.

419

## 420 **Molecular Dynamics simulations identify novel binding pocket in PlyC**

421 Our biochemical investigations revealed that PlyCB interacts directly with the pRha backbone of  
422 the GAC as shown in the cellular context of the native streptococcal cells, engineered *E. coli*  
423 cells and *S. mutans* mutant strains. In contrast, traditional biochemical techniques such as size  
424 exclusion chromatography or isothermal titration calorimetry could not detect the binding of  
425 PlyCB when either the short or long pRha fragments were used (data not shown). These results  
426 corroborate the previous studies on related proteins, showing that the binding between  
427 endolysins to their respective isolated or purified cell wall ligands is challenging to characterize  
428 [52, 53]. However, the CBD is a carbohydrate binding module, which often contains the  
429 prominent binding sites to selectively coordinate the binding of linear polysaccharides (reviewed  
430 in [54]). To identify the prominent binding sites for pRha, we investigated the previously reported  
431 crystal structures of PlyCB<sub>WT</sub> and PlyCB<sub>R66E</sub> with the ligand site identification software SiteMap  
432 [55]. The software identifies cavities on the molecular surface of a protein structure and provides  
433 a 'druggability score', which indicates the likelihood that an identified site can bind a small  
434 molecule. Interestingly, for both PlyCB<sub>WT</sub> and PlyCB<sub>R66E</sub> protein structures, no druggable sites  
435 were identified (SF2). In the PlyCB<sub>WT</sub> structure, a small shallow cavity in proximity of R66 was  
436 identified, but with a very poor druggability score (0.4). Shen *et al.*, had previously reported a  
437 putative phosphate binding site in PlyCB [56], however, we concluded from our studies that no  
438 pocket or cavity is large enough to accommodate the pRha structure. Protein crystal structures  
439 represent a fixed conformation state that does not have to reflect the native fold in solution or in  
440 the context of the respective ligands. Riley *et al.* reported previously a PlyCB SAXS in solution  
441 structure [57] where a high degree of flexibility and movement of the PlyCB octameric ring was  
442 revealed. We therefore conducted Molecular Dynamics (MD) simulations on the PlyCB<sub>WT</sub>  
443 structure (PDB 4F87) [13] to investigate how the protein structure changes over time. The  
444 structure was simulated as a monomeric protein for 500 ns in the explicit solvent mode.  
445 Strikingly, the PlyCB<sub>WT</sub> structure changed into an 'open' conformation, where Y28 rotates and

446 remains stable in a new conformation, generating a novel pocket (SF3). In the WT crystal  
447 structure, R29 establishes a salt bridge with E36 in the same  $\beta$ -hairpin and has a repulsive  
448 interaction with R66 on the  $\alpha$ -helix. This repulsive effect results in a higher mobility of the  
449 terminal part of the  $\beta$ -strand which allows the stabilisation of an open conformation of Y28  
450 (SF3). The stabilisation of the open conformation of Y28 opens a cavity that is clearly visible on  
451 the molecular surface of the WT structure and is identified by SiteMap as a druggable binding  
452 site (score 0.8) (SF2).

453

454 It is well reported in the literature that a PlyC holoenzyme formed by PlyCA and the PlyCB<sub>R66E</sub>  
455 mutant protein is not able to lyse GAS [56]. Our biochemical studies have revealed that the  
456 PlyCB<sub>R66E</sub> mutant does not bind pRha. We therefore conducted MD simulations also on the  
457 reported PlyCB<sub>R66E</sub> crystal structure. In agreement with the PlyCB<sub>WT</sub> protein simulations, the  
458 structure was stable. Contrary to the PlyCB<sub>WT</sub> protein, the rotation of Y28 was not observed and  
459 subsequently, no cavity/pocket is formed (SF4). We inspected the conformation of the mutated  
460 residues in PlyCB<sub>R66E</sub>. The side chain of R66E forms a stable salt bridge with R29, increasing  
461 the structural rigidity and preventing the opening of Y28 (SF4). Interestingly, the site controlled  
462 by Y28 is not at the protein-protein interface, but within the monomeric structure, suggesting  
463 that a ligand binding pocket exists within the monomeric protein and is not at the interface of two  
464 neighboring monomers (SF2 1B, Fig. 6).

465

#### 466 **PlyCB-rhamnose di- and tri-saccharide docking reveals potential interactions**

467 The MD simulations revealed a potential ligand binding site in PlyCB<sub>WT</sub> that is generated after  
468 the gatekeeper Y28 rotated towards the  $\alpha$ -helix. We conducted ligand-protein docking using a  
469 Rha di- and tri-saccharide, with both possible linkage configurations. The Rha disaccharide and  
470 trisaccharide with a non-reducing end  $\alpha$ 1,2-Rha (SF5) produced the congruent docking results,

471 which we further analyzed (Fig. 6, SF6). The Rha disaccharide with the non-reducing end (1->3)  
472 linkage appears to be stabilized by four hydrogen bond interactions (SF7 A, B). The terminal  
473 reducing end Rha is within the hydrogen bond distance to S17 and T12, whilst the  $\alpha$ 1,3-linked  
474 non-reducing end Rha is able to interact with the carbonyl backbone of F10. The identical  
475 interactions are observed for the docked trisaccharide (SF7 C, D). In addition, the non-reducing  
476 end Rha of the trisaccharide also interacts with the side chain hydroxyl groups of S54 and Q49  
477 (SF7 C, D). When we carefully inspected the structural context of the Rha trisaccharide with the  
478 terminal  $\alpha$ 1,2-linked Rha moieties, we detected the adjacent pockets that could potentially bind  
479 the GlcNAc side chain linked to these Rha moieties (SF8 A, B). It is beyond the scope of this  
480 study to confirm that these pockets have the ability to bind the GAC  $\beta$ -GlcNAc sidechain or in  
481 fact the Group C Carbohydrate (GCC)  $\beta$ -GalNAc-GalNAc disaccharide. However, this model is  
482 consistent with PlyCB binding the unmodified pRha backbone and the backbone decorated with  
483 the GAC or GCC side chains. The model also explains why the *S. mutans* SCC — with the  $\alpha$ -2-  
484 Glc substitution on the  $\alpha$ 1,3-linked Rha — is not a ligand for the PlyCB protein. The identified  
485 pocket does not allow the binding of the SCC with the side chain in this configuration (SF8 A,  
486 C).

487

#### 488 **Polyrhamnose binding pocket suggests the PlyC catalytic mechanism**

489 We further investigated the structural context of this binding pocket, which is perpendicular to  
490 the PlyCB monomer-monomer interface. We superposed the reported PlyCA structure that also  
491 contains the GlyH and CHAP amidase domains (Fig 7). This led to the intriguing discovery that  
492 this model would not only explain the specificity of the enzyme, but also the substrate  
493 recognition by the CHAP amidase and GlyH domains. The proposed pRha binding pocket is  
494 perpendicular to the GlyH and CHAP amidase domains, that bind the PG backbone and  
495 crosslinked peptides. Similar to wall teichoic acids[58], the GAC and GCC are likely directly

496 linked via their reducing end sugars to *N*-acetylmuramic acid (MurNAc) of PG. We observed that  
497 the reducing end sugar of the docked complex points towards the GlyH and CHAP amidase  
498 domains. When we compare this structural alignment with the architectural arrangement of the  
499 crosslinked PG decorated with the GAC, the model greatly assists our understanding of  
500 PlyCAactivity: the CHAP amidase domain cleaves the PG peptide bond. This allows the PG to  
501 open up and slide into the GlyH domain, which removes the PG GlcNAc-MurNAc from the  
502 reducing end. Concurrently, the GAC attached to the PG binds to the octameric PlyCB domains.  
503 We docked a PG tetrasaccharide into the reported PlyCA GlyH domain (Fig. 7). This positions  
504 the PG in 5-7Å, the distance that the terminal GAC sugar, GlcNAc, could occupy [23].

505

#### 506 **Concluding remarks**

507

508 Strikingly, our PlyC molecular dynamics simulations revealed a previously unknown  
509 conformational change that exposes a potential carbohydrate binding site. Our simulations  
510 agree with the reported flexibility of the PlyCB structure in solution, as determined by SAXS  
511 studies [57]. The reported crystal structure represents a locked state that appears to be the  
512 most stable configuration in the crystallization conditions, in absence of any ligand. The side  
513 chain of Y28 acts as gatekeeper and conformational changes allow opening of a cavity that is  
514 likely capable of recognizing the compounds in the size of several sugar residues. These  
515 structural changes are possible due to an intrinsic flexibility introduced by the repulsion between  
516 the side chains of R29 (adjacent to Y28) and R66 (SF3). Moreover, we propose a structural  
517 feature of the PlyCB protein that explains why only certain streptococci are susceptible to PlyC's  
518 lytic activity. The pRha decorated with an  $\alpha$ -linked side chain sugar is not compatible with the  
519 PlyCB ligand binding site and therefore only those streptococci expressing pRha decorated with  
520  $\beta$ -linked substituents, such as GlcNAc and GlcNAc-GroP are susceptible. This could potentially  
521 be exploited for diagnostic purposes or in the case of SCC and Group G Streptococci, opens up

522 the potential for novel therapeutic approaches. If SCC was treated by PlyC in combination with  
523 an additional enzyme that removes the  $\alpha$ -linked side chains in these streptococcal  
524 carbohydrates, this would expose the pRha backbone and subsequently make these strains  
525 susceptible. The identification of the pRha ligand site could also be further exploited by directed  
526 evolution approaches to generate PlyCB protein variants that are capable to bind the  
527 carbohydrates from, for example, SCC and Group G Streptococci. Since our proposed ligand  
528 binding site is on the surface of each PlyCB monomer mutagenesis would most likely not impact  
529 the multimerization interface of the PlyCB octameric ring.

530

531 Whilst much has been learned about the structure and function of PlyC in the past 20 years,  
532 many questions remain, specifically with respect to its interaction with the PG. Considering the  
533 average length of the cellular pRha is 7-10 kDa [25] and that our MD simulations shows an  
534 individual PlyCB monomer can bind its target ligand, the  $\alpha$ 1,2-1,3-pRha with or without  $\beta$ -  
535 configured GlcNAc/GalNAc-side chains, it is inviting to speculate that an element of avidity is  
536 responsible for tight binding of the PlyCB octamer to the streptococcal surface. We have  
537 envisioned a model in Fig. 7, although further proof is needed to substantiate this hypothesis.  
538 Another question lies in the actions of the EADs relative to the PlyCB octamer. PlyC clearly has  
539 a high turnover as demonstrated in multiple biochemical assays. However, it is unknown if  
540 PlyCB “docks” to the surface and the flexibility of the holoenzyme allows the PlyC EADs to  
541 cleave multiple bonds in a localized area weakening the overall superstructure of the PG.  
542 Alternatively, the enzymatic turnover could be dictated by a balance of on and off rates of the  
543 EADs and CBD monomers leading to widespread hydrolysis of the PG. Lastly, it is unknown  
544 whether PlyC binds, cleaves, and releases the PG at random points on the streptococcal  
545 surface or works its way down a single strand of PG in a processive manner. It is noteworthy  
546 that cellulase enzymes, which cleave the  $\beta$ 1,4 glycosidic linkages in cellulose, possess a

547 catalytic domain, a flexible linker, and a cellulose binding domain, analogous to the traditional  
548 endolysins. It has been demonstrated that energy is stored in the flexible linker can adopt  
549 compact and extended configurations that allows the cellulase to move in a “caterpillar-like”  
550 motion down a chain of cellulose [59, 60]. Although PlyC does not contain an equivalent flexible  
551 linker, the octameric nature of PlyCB invites the possibility that it may interact with the  
552 successive pRha strands allowing PlyC to depolymerize the PG in a zipper-like fashion.

553

554 In conclusion, the  $\alpha$ 1,2-1,3-pRha is the definite, minimal carbohydrate substrate for the PlyCB  
555 subunit. We validated this by comprehensive experiments, using pRha recombinantly produced  
556 in *E. coli*, and the *S. mutans* variants of the Rha-based polysaccharides. Furthermore, the MD  
557 simulations and subsequent docking studies revealed a potential binding site for Rha tri-  
558 saccharides. Further studies are needed to detail the dynamics of the PlyC holoenzyme on the  
559 streptococcal surface and the interdomain interactions. Nonetheless, the work described here  
560 provides valuable insight into the molecular interactions that define a PlyC’s host specificity,  
561 which can inform the future studies as well as engineering approaches.

562

### 563 **Data Availability Statement**

564 No mandated datasets are associated with the paper.

565

566

567

568

569

570

571

572

573 **Figure Legend**

574 Fig 1)

575 A) Symbolic drawings of the carbohydrate structures of GAS (GAC), polyrhamnose backbone  
576 (pRha) in GAVS and M1\_*dgacl*, GCS (GCC), GGS (GGC) and *S. mutans* (SCC). For simplicity,  
577 the reported glycerol phosphate of occasionally present on the GAC and SCC side chains have  
578 been omitted. Repeat units are marked with brackets. The pRha backbone with alternating ( $\alpha$ 1-  
579  $\rightarrow$ 2) and ( $\alpha$ 1- $\rightarrow$ 3) linkages, whilst the  $\alpha$ 1- $\rightarrow$ 2 Rha being decorated with a  $\beta$ 1- $\rightarrow$ 3 side chain is a  
580 commonality among all PlyC susceptible strains. B) PlyC lysis of streptococcal pathogens.  
581 Group A and Group C Streptococci serotypes are susceptible to PlyC-mediated lysis. Group G  
582 Streptococci show limited susceptibility and *S. mutans* is resistant to PlyC lysis. Three SDSE  
583 isolates that produce the GAC instead of GGC (SDSE\_*gac*) are susceptible to PlyC treatment.

584

585 Fig 2)

586 Precipitation studies of purified PlyCB and GAC reveal direct interaction of PlyCB with GAC. A)  
587 The PlyCB concentration is kept constant whilst the GAC concentration is varied. Visible  
588 precipitate forms at the higher concentrations. B) The precipitate level is measured  
589 spectrophotometrically at 340 nm and compared to the mutant PlyCB<sub>R66E</sub>, which does not bind  
590 the GAC. C) Coomassie stained and D) densitometry analysis of PlyCB protein from the  
591 supernatant fraction and aggregates (pellets). E, F) The same dose dependency is observed  
592 when the PlyCB concentration is varied. Arrowhead depicts PlyCB protein at 8 kDa.

593

594 Fig 3)

595 Representation of immunoblot analysis of the cell lysate of *E. coli* expressing the SCC and GAC  
596 pRha and carrying an empty control plasmid (-ve). A) Blot was incubated with PlyCB-Alexa  
597 Fluor® 647 (PlyCB<sub>WT</sub><sup>AF647</sup>). B) Probing the same samples with the GAC antibodies confirms the  
598 presence of GAC in the bands. Molecular mass markers are given in kDa.



599

600 Fig 4)

601 PlyCB binding to *E. coli* cells were investigated by flow cytometry after labelling with  
602 PlyCB<sub>WT</sub><sup>AF647</sup> and PlyCB<sub>R66E</sub><sup>AF645</sup> mutant proteins. Blue: -ve control cells without pRha. Red:  
603 pRha producing *E. coli* cells. Representative histograms are shown. A) Left panel: unstained  
604 cells. Right panel: The anti-GAC antibodies (GAC-FITC) were used as a positive control to label  
605 the *E. coli* cells producing pRha. The antibodies do not bind to the *E. coli* cells carrying an  
606 empty plasmid (-ve). B) Left panel: PlyCB<sub>WT</sub><sup>AF647</sup> binds to the *E. coli* cells producing pRha, but  
607 not to the *E. coli* cells carrying an empty plasmid (-ve). Right panel: PlyCB<sub>R66E</sub><sup>AF645</sup> does not  
608 binds to the *E. coli* cells producing pRha.

609

610 Fig 5)

611 The PlyC-mediated lysis of sacculi purified from *S. mutans* strains. The lysis was monitored  
612 after 10, 20, 30, 40, 50 and 60 min as a decrease in OD<sub>600</sub>. Results are presented as a fold  
613 change in OD<sub>600</sub> of the sacculi incubated with PlyC vs. the sacculi incubated without PlyC. Data  
614 points and error bars represent mean values of four biological replicates and standard deviation,  
615 respectively. P-values were determined by two-way ANOVA with Dunnett's multiple  
616 comparisons test.

617

618 Fig 6)

619 Bottom view of the PlyCB protein structures in surface representation. The octameric PlyCB  
620 structure with brown A, C, E, G and orange B, D, F, H monomers. A) WT (GH and CHAP  
621 domain omitted, 4f87.pdb) B) WT after MD with docked tri-Rha. The MD simulations have  
622 revealed a novel pocket that could accommodate the binding of short Rha-polysaccharides.

623

624 Fig 7)

625 A schematic model of the proposed PlyC binding to the streptococcal cell wall. A) PlyC in the  
626 complex with docked PG tetra-saccharide in the GlyH domain (red) and pRha tri-saccharides in  
627 PlyCB subunits. B) A schematic model showing PlyC binding to peptidoglycan and pRha.  
628 Sugars are drawn to scale, with green triangles (Rha), blue square (GlcNAc) and beige square  
629 (MurNAc). Proposed PlyC activity: The EAD cleaves the PG peptide to open up the PG  
630 backbones that subsequently enter the GlyH domain (red) for PG cleavage.

631

### 632 **FUNDING**

633 The HCD laboratory is supported by Wellcome and Royal Society Grant 109357/Z/15/Z and the  
634 University of Dundee Wellcome Trust Funds 105606/Z/14/Z and Tenovus Scotland Large  
635 Research Grant [T17/17]. HK is supported by the National Institute of Standards and  
636 Technology (NIST). VAF is supported by Rockefeller University laboratory funds. NK is  
637 supported by NIH grants R01 DE028916 from the NIDCR and R01 AI143690 from the NIAID.

638

### 639 **ACKNOWLEDGEMENTS**

640 We thank the CDC Streptococcus Lab and the Active Bacterial Core surveillance program for  
641 sharing isolates isolate 20170556 (stG6.0), 20171682 (stC74A.0), 20154376 (stG245.0),  
642 20173686 (stG652.0), 20170560 and 20176966 (stG485.0). We also thank Ryan Heselpoth,  
643 Yang Shen, and Sara Linden for reagents, technical advice, and helpful discussion.

644

645

### 646 **References**

- 647 1 Fernandes, S. and Sao-Jose, C. (2018) Enzymes and Mechanisms Employed by Tailed  
648 Bacteriophages to Breach the Bacterial Cell Barriers. *Viruses*. **10**  
649 2 Nelson, D., Loomis, L. and Fischetti, V. A. (2001) Prevention and elimination of upper  
650 respiratory colonization of mice by group A streptococci by using a bacteriophage lytic enzyme.  
651 *Proc Natl Acad Sci U S A*. **98**, 4107-4112

- 652 3 Dams, D. and Briers, Y. (2019) Enzybiotics: Enzyme-Based Antibacterials as  
653 Therapeutics. *Adv Exp Med Biol.* **1148**, 233-253
- 654 4 Love, M. J., Bhandari, D., Dobson, R. C. J. and Billington, C. (2018) Potential for  
655 Bacteriophage Endolysins to Supplement or Replace Antibiotics in Food Production and Clinical  
656 Care. *Antibiotics (Basel).* **7**
- 657 5 Schmelcher, M. and Loessner, M. J. (2020) Bacteriophage endolysins - extending their  
658 application to tissues and the bloodstream. *Curr Opin Biotechnol.* **68**, 51-59
- 659 6 Heselpoth, R. D., Swift, S. M., Linden, S. B., Mitchell, M. S. and Nelson, D. C. (2018)  
660 Enzybiotics: endolysins and bacteriocins. In *Bacteriophages - biology, technology, and therapy*  
661 (Harper, D., Abedon, S. T., Burrowes, B. and McConvill, M., eds.), Springer International  
662 Publishing, Dordrecht, The Netherlands
- 663 7 Loessner, M. J., Kramer, K., Ebel, F. and Scherer, S. (2002) C-terminal domains of  
664 *Listeria monocytogenes* bacteriophage murein hydrolases determine specific recognition and  
665 high-affinity binding to bacterial cell wall carbohydrates. *Molecular microbiology.* **44**, 335-349
- 666 8 Mesnage, S., Dellarole, M., Baxter, N. J., Rouget, J. B., Dimitrov, J. D., Wang, N.,  
667 Fujimoto, Y., Hounslow, A. M., Lacroix-Desmazes, S., Fukase, K., Foster, S. J. and Williamson,  
668 M. P. (2014) Molecular basis for bacterial peptidoglycan recognition by LysM domains. *Nat*  
669 *Commun.* **5**, 4269
- 670 9 Evans, A. C. (1934) *Streptococcus* bacteriophage: a study of four serological types.  
671 *Public Health Rep.* **49**, 1386-1401
- 672 10 Krause, R. M. (1957) Studies on bacteriophages of hemolytic streptococci. I. Factors  
673 influencing the interaction of phage and susceptible host cell. *J Exp Med.* **106**, 365-384
- 674 11 Maxted, W. R. (1957) The active agent in nascent phage lysis of streptococci. *J Gen*  
675 *Microbiol.* **16**, 584-595
- 676 12 Nelson, D., Schuch, R., Chahales, P., Zhu, S. and Fischetti, V. A. (2006) PlyC: a  
677 multimeric bacteriophage lysin. *Proc Natl Acad Sci U S A.* **103**, 10765-10770
- 678 13 McGowan, S., Buckle, A. M., Mitchell, M. S., Hoopes, J. T., Gallagher, D. T., Heselpoth,  
679 R. D., Shen, Y., Reboul, C. F., Law, R. H., Fischetti, V. A., Whisstock, J. C. and Nelson, D. C.  
680 (2012) X-ray crystal structure of the streptococcal specific phage lysin PlyC. *Proc Natl Acad Sci*  
681 *U S A.* **109**, 12752-12757
- 682 14 Lancefield, R. C. (1933) A Serological Differentiation of Human and Other Groups of  
683 Hemolytic Streptococci. *J Exp Med.* **57**, 571-595
- 684 15 Vandamme, P., Pot, B., Falsen, E., Kersters, K. and Devriese, L. A. (1996) Taxonomic  
685 study of lancefield streptococcal groups C, G, and L (*Streptococcus dysgalactiae*) and proposal  
686 of *S. dysgalactiae* subsp. *equisimilis* subsp. nov. *Int J Syst Bacteriol.* **46**, 774-781
- 687 16 Coligan, J. E., Kindt, T. J. and Krause, R. M. (1978) Structure of the streptococcal  
688 groups A, A-variant and C carbohydrates. *Immunochemistry.* **15**, 755-760
- 689 17 Pritchard D G, G. R. L., Michlek S M, McGhee J R. . (1986) Biochemical aspects of  
690 serotype carbohydrate antigens of *Streptococcus mutans*. In: Hamada S, Michalek S M, Kiyono  
691 H, Menaker L, McGhee J R, editors. *Molecular microbiology and immunology of Streptococcus*  
692 *mutans*. Amsterdam, The Netherlands: . Elsevier Science Publishers; , pp. 39–49.
- 693 18 Coligan, J. E., Schnute, W. C., Jr. and Kindt, T. J. (1975) Immunochemical and chemical  
694 studies on streptococcal group-specific carbohydrates. *J Immunol.* **114**, 1654-1658
- 695 19 Huang, D. H., Rama Krishna, N. and Pritchard, D. G. (1986) Characterization of the  
696 group A streptococcal polysaccharide by two-dimensional <sup>1</sup>H-nuclear-magnetic-resonance  
697 spectroscopy. *Carbohydrate research.* **155**, 193-199
- 698 20 Neiwert, O., Holst, O. and Duda, K. A. (2014) Structural investigation of rhamnose-rich  
699 polysaccharides from *Streptococcus dysgalactiae* bovine mastitis isolate. *Carbohydr Res.* **389**,  
700 192-195
- 701 21 Edgar, R. J., van Hensbergen, V. P., Ruda, A., Turner, A. G., Deng, P., Le Breton, Y.,  
702 El-Sayed, N. M., Belew, A. T., Mclver, K. S., McEwan, A. G., Morris, A. J., Lambeau, G.,

- 703 Walker, M. J., Rush, J. S., Korotkov, K. V., Widmalm, G., van Sorge, N. M. and Korotkova, N.  
704 (2019) Discovery of glycerol phosphate modification on streptococcal rhamnose  
705 polysaccharides. *Nature chemical biology*. **15**, 463-471
- 706 22 van der Beek, S. L., Zorzoli, A., Canak, E., Chapman, R. N., Lucas, K., Meyer, B. H.,  
707 Evangelopoulos, D., de Carvalho, L. P. S., Boons, G. J., Dorfmüller, H. C. and van Sorge, N.  
708 M. (2019) Streptococcal dTDP-L-rhamnose biosynthesis enzymes: functional characterization  
709 and lead compound identification. *Molecular microbiology*. **111**, 951-964
- 710 23 Zorzoli, A., Meyer, B. H., Adair, E., Torgov, V. I., Veselovsky, V. V., Danilov, L. L., Uhrin,  
711 D. and Dorfmüller, H. C. (2019) Group A, B, C, and G Streptococcus Lancefield antigen  
712 biosynthesis is initiated by a conserved alpha-d-GlcNAc-beta-1,4-l-rhamnosyltransferase. *J Biol*  
713 *Chem*. **294**, 15237-15256
- 714 24 van der Beek, S. L., Le Breton, Y., Ferenbach, A. T., Chapman, R. N., van Aalten, D. M.,  
715 Navratilova, I., Boons, G. J., Mclver, K. S., van Sorge, N. M. and Dorfmüller, H. C. (2015)  
716 GacA is essential for Group A Streptococcus and defines a new class of monomeric dTDP-4-  
717 dehydrorhamnose reductases (RmlD). *Molecular microbiology*. **98**, 946-962
- 718 25 Rush, J. S., Edgar, R. J., Deng, P., Chen, J., Zhu, H., van Sorge, N. M., Morris, A. J.,  
719 Korotkov, K. V. and Korotkova, N. (2017) The molecular mechanism of N-acetylglucosamine  
720 side-chain attachment to the Lancefield group A carbohydrate in Streptococcus pyogenes. *J*  
721 *Biol Chem*. **292**, 19441-19457
- 722 26 Lood, R., Raz, A., Molina, H., Euler, C. W. and Fischetti, V. A. (2014) A highly active and  
723 negatively charged Streptococcus pyogenes lysin with a rare D-alanyl-L-alanine endopeptidase  
724 activity protects mice against streptococcal bacteremia. *Antimicrob Agents Chemother*. **58**,  
725 3073-3084
- 726 27 Gera, K. and Mclver, K. S. (2013) Laboratory growth and maintenance of Streptococcus  
727 pyogenes (the Group A Streptococcus, GAS). *Curr Protoc Microbiol*. **30**, 9D 2 1-9D 2 13
- 728 28 Shibata, Y., Yamashita, Y., Ozaki, K., Nakano, Y. and Koga, T. (2002) Expression and  
729 characterization of streptococcal rgp genes required for rhamnan synthesis in Escherichia coli.  
730 *Infect Immun*. **70**, 2891-2898
- 731 29 DuBois, M., Gilles, K. A., Hamilton, J. K., Rebers, P. A. and Smith, F. (1956) Colorimetric  
732 method for determination of sugars and related substances. *Anal. Chem*. **28**, 350-356
- 733 30 Heselpoth, R. D., Yin, Y., Moul, J. and Nelson, D. C. (2015) Increasing the stability of  
734 the bacteriophage endolysin PlyC using rationale-based FoldX computational modeling. *Protein*  
735 *Eng Des Sel*. **28**, 85-92
- 736 31 Case DA, e. a. (2016) AMBER2016. University of California, San Francisco  
737
- 738 32 Maier, J. A., Martinez, C., Kasavajhala, K., Wickstrom, L., Hauser, K. E. and Simmerling,  
739 C. (2015) ff14SB: Improving the Accuracy of Protein Side Chain and Backbone Parameters  
740 from ff99SB. *J Chem Theory Comput*. **11**, 3696-3713
- 741 33 Darden, T. A. and Pedersen, L. G. (1993) Molecular modeling: an experimental tool.  
742 *Environ Health Perspect*. **101**, 410-412
- 743 34 Jean-Paul Ryckaert, G. C., Herman J.C Berendsen. (1977) Numerical integration of the  
744 cartesian equations of motion of a system with constraints: molecular dynamics of n-alkanes.  
745 *Journal of Computational Physics*. **23**, 327-341
- 746 35 DeLano, W. L. (2002) The PyMOL Molecular Graphics System. Delano Scientific, San  
747 Carlos.
- 748 36 William Humphrey, A. D., Klaus Schulten. (1996) VMD: Visual molecular dynamics.  
749 *Journal of Molecular Graphics*. **14**, 33-38
- 750 37 2021-1.; S. R. (2021) LigPrep Schrödinger, LLC, New York, NY
- 751 38 M., M. (1952) The lysis of group A hemolytic streptococci by extracellular enzymes of  
752 Streptomyces albus. II. Nature of the cellular substrate attacked by the lytic enzymes. . *J Exp*  
753 *Med*. . **96**, 569-580

- 754 39 Davies, M. R., McIntyre, L., Mutreja, A., Lacey, J. A., Lees, J. A., Towers, R. J.,  
755 Duchene, S., Smeesters, P. R., Frost, H. R., Price, D. J., Holden, M. T. G., David, S., Giffard, P.  
756 M., Worthing, K. A., Seale, A. C., Berkley, J. A., Harris, S. R., Rivera-Hernandez, T., Berking,  
757 O., Cork, A. J., Torres, R., Lithgow, T., Strugnell, R. A., Bergmann, R., Nitsche-Schmitz, P.,  
758 Chhatwal, G. S., Bentley, S. D., Fraser, J. D., Moreland, N. J., Carapetis, J. R., Steer, A. C.,  
759 Parkhill, J., Saul, A., Williamson, D. A., Currie, B. J., Tong, S. Y. C., Dougan, G. and Walker, M.  
760 J. (2019) Author Correction: Atlas of group A streptococcal vaccine candidates compiled using  
761 large-scale comparative genomics. *Nat Genet.* **51**, 1295
- 762 40 Brandt, C. M., Haase, G., Schnitzler, N., Zbinden, R. and Luttkicken, R. (1999)  
763 Characterization of blood culture isolates of *Streptococcus dysgalactiae* subsp. *equisimilis*  
764 possessing Lancefield's group A antigen. *J Clin Microbiol.* **37**, 4194-4197
- 765 41 Chochua, S., Metcalf, B. J., Li, Z., Rivers, J., Mathis, S., Jackson, D., Gertz, R. E., Jr.,  
766 Srinivasan, V., Lynfield, R., Van Beneden, C., McGee, L. and Beall, B. (2017) Population and  
767 Whole Genome Sequence Based Characterization of Invasive Group A Streptococci Recovered  
768 in the United States during 2015. *mBio.* **8**
- 769 42 McMillan, D. J., Vu, T., Bramhachari, P. V., Kaul, S. Y., Bouvet, A., Shaila, M. S.,  
770 Karmarkar, M. G. and Sriprakash, K. S. (2010) Molecular markers for discriminating  
771 *Streptococcus pyogenes* and *S. dysgalactiae* subspecies *equisimilis*. *Eur J Clin Microbiol Infect*  
772 *Dis.* **29**, 585-589
- 773 43 Lynskey, N. N., Jauneikaite, E., Li, H. K., Zhi, X., Turner, C. E., Mosavie, M., Pearson,  
774 M., Asai, M., Lobkowicz, L., Chow, J. Y., Parkhill, J., Lamagni, T., Chalker, V. J. and  
775 Sriskandan, S. (2019) Emergence of dominant toxigenic M1T1 *Streptococcus pyogenes* clone  
776 during increased scarlet fever activity in England: a population-based molecular epidemiological  
777 study. *Lancet Infect Dis.* **19**, 1209-1218
- 778 44 Pritchard, D. G., Rener, B. P., Furner, R. L., Huang, D. H. and Krishna, N. R. (1988)  
779 Structure of the group G streptococcal polysaccharide. *Carbohydr Res.* **173**, 255-262
- 780 45 Mirica, K. A., Lockett, M. R., Snyder, P. W., Shapiro, N. D., Mack, E. T., Nam, S. and  
781 Whitesides, G. M. (2012) Selective precipitation and purification of monovalent proteins using  
782 oligovalent ligands and ammonium sulfate. *Bioconjug Chem.* **23**, 293-299
- 783 46 Sato, T., Mattison, K. W., Dubin, P. L., Kamachi, M. and Morishima, Y. (1998) Effect of  
784 protein aggregation on the binding of lysozyme to pyrene-labeled polyanions. *Langmuir.* **14**,  
785 5430-5437
- 786 47 Wilcken, R., Wang, G., Boeckler, F. M. and Fersht, A. R. (2012) Kinetic mechanism of  
787 p53 oncogenic mutant aggregation and its inhibition. *Proc Natl Acad Sci U S A.* **109**, 13584-  
788 13589
- 789 48 Michon, F., Moore, S. L., Kim, J., Blake, M. S., Auzanneau, F. I., Johnston, B. D.,  
790 Johnson, M. A. and Pinto, B. M. (2005) Doubly branched hexasaccharide epitope on the cell  
791 wall polysaccharide of group A streptococci recognized by human and rabbit antisera. *Infect*  
792 *Immun.* **73**, 6383-6389
- 793 49 van Sorge, N. M., Cole, J. N., Kuipers, K., Henningham, A., Aziz, R. K., Kasirer-Friede,  
794 A., Lin, L., Berends, E. T. M., Davies, M. R., Dougan, G., Zhang, F., Dahesh, S., Shaw, L., Gin,  
795 J., Cunningham, M., Merriman, J. A., Hutter, J., Lepenies, B., Rooijackers, S. H. M., Malley, R.,  
796 Walker, M. J., Shattil, S. J., Schlievert, P. M., Choudhury, B. and Nizet, V. (2014) The classical  
797 lancefield antigen of group A *Streptococcus* is a virulence determinant with implications for  
798 vaccine design. *Cell Host Microbe.* **15**, 729-740
- 799 50 Svetlana Zamakhaeva, C. T. C., Jeffrey S. Rush, Sowmya Ajay Castro, Alexander E.  
800 Yarawsky, Andrew B. Herr, Nina M. van Sorge, Helge C. Dorfmueller, Gregory I. Frolenkov,  
801 Konstantin V. Korotkov, Natalia Korotkova. (2020) Modification of cell wall polysaccharide  
802 spatially controls cell division in *Streptococcus mutans*. *bioRxiv*
- 803 51 De, A., Liao, S., Bitoun, J. P., Roth, R., Beatty, W. L., Wu, H. and Wen, Z. T. (2017)  
804 Deficiency of RgpG causes major defects in cell division and biofilm formation, and deficiency of

805 LytR-CpsA-Psr family proteins leads to accumulation of cell wall antigens in culture medium by  
806 *Streptococcus mutans*. Appl Environ Microbiol. **83**  
807 52 Ganguly, J., Low, L. Y., Kamal, N., Saile, E., Forsberg, L. S., Gutierrez-Sanchez, G.,  
808 Hoffmaster, A. R., Liddington, R., Quinn, C. P., Carlson, R. W. and Kannenberg, E. L. (2013)  
809 The secondary cell wall polysaccharide of Bacillus anthracis provides the specific binding ligand  
810 for the C-terminal cell wall-binding domain of two phage endolysins, PlyL and PlyG.  
811 Glycobiology. **23**, 820-832  
812 53 Shen, Y., Kalograiaki, I., Prunotto, A., Dunne, M., Boulos, S., Taylor, N. M. I., Sumrall, E.  
813 T., Eugster, M. R., Martin, R., Julian-Rodero, A., Gerber, B., Leiman, P. G., Menendez, M., Dal  
814 Peraro, M., Canada, F. J. and Loessner, M. J. (2021) Structural basis for recognition of bacterial  
815 cell wall teichoic acid by pseudo-symmetric SH3b-like repeats of a viral peptidoglycan  
816 hydrolase. Chemical Science. **12**, 576-589  
817 54 Shoseyov, O., Shani, Z. and Levy, I. (2006) Carbohydrate binding modules: biochemical  
818 properties and novel applications. Microbiol Mol Biol Rev. **70**, 283-295  
819 55 Halgren, T. (2007) New method for fast and accurate binding-site identification and  
820 analysis. Chem Biol Drug Des. **69**, 146-148  
821 56 Shen, Y., Barros, M., Vennemann, T., Gallagher, D. T., Yin, Y., Linden, S. B., Heselpoth,  
822 R. D., Spencer, D. J., Donovan, D. M., Moulton, J., Fischetti, V. A., Heinrich, F., Losche, M. and  
823 Nelson, D. C. (2016) A bacteriophage endolysin that eliminates intracellular streptococci. eLife.  
824 **5**  
825 57 Riley, B. T., Broendum, S. S., Reboul, C. F., Cowieson, N. P., Costa, M. G., Kass, I.,  
826 Jackson, C., Perahia, D., Buckle, A. M. and McGowan, S. (2015) Dynamic Motion and  
827 Communication in the Streptococcal C1 Phage Lysin, PlyC. PLoS One. **10**, e0140219  
828 58 Brown, S., Santa Maria, J. P., Jr. and Walker, S. (2013) Wall teichoic acids of gram-  
829 positive bacteria. Annu Rev Microbiol. **67**, 313-336  
830 59 Rabinovich, M. L., Melnick, M. S. and Bolobova, A. V. (2002) The structure and  
831 mechanism of action of cellulolytic enzymes. Biochemistry (Mosc). **67**, 850-871  
832 60 McCabe, C., Zhao, X., Adney, W. S., Himmel, M. E. (2010) Energy Storage in Cellulase  
833 Linker Peptides? Computational Modeling in Lignocellulosic Biofuel Production. **1052**, 119-134  
834

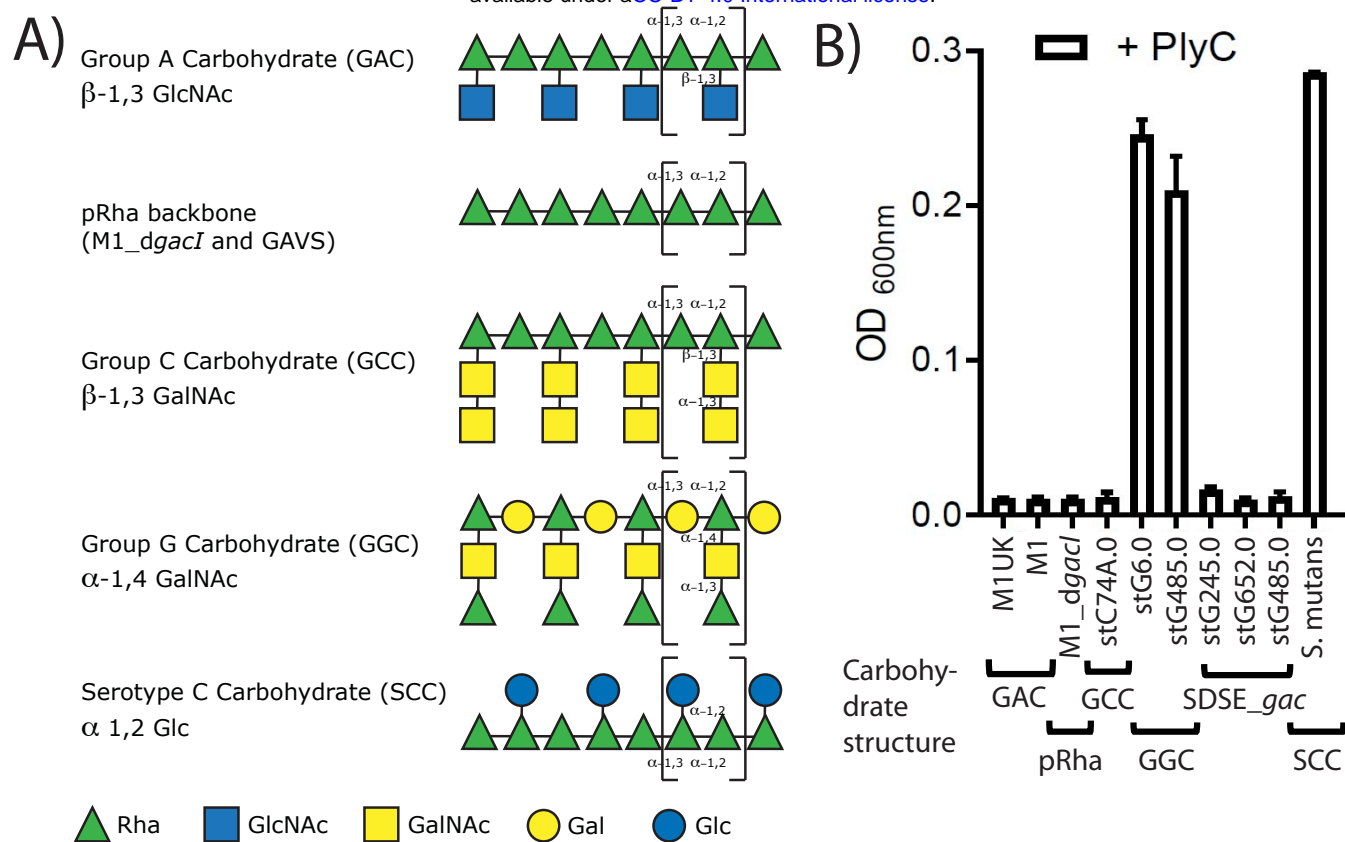

Fig 1)

A) Symbolic drawings of the carbohydrate structures of GAS (GAC), polyrhamnose backbone (pRha) in GAVS and M1\_dgacI, GCS (GCC), GGS (GGC) and S. mutans (SCC). For simplicity, the reported glycerol phosphate of occasionally present on the GAC and SCC side chains have been omitted. Repeat units are marked with brackets. The pRha backbone with alternating (α1->2) and (α1->3) linkages, whilst the α1->2 rhamnose being decorated with a β1->3 side chain is a commonality among all PlyC susceptible strains. B) PlyC lysis of streptococcal pathogens. Group A and Group C Streptococci serotypes are susceptible to PlyC-mediated lysis. Group G Streptococci show limited susceptibility and S. mutans is resistant to PlyC lysis. Three SDSE isolates that produce the GAC instead of GGC (SDSE\_gac) are susceptible to PlyC treatment.

## Visualizing Precipitation in 96w Plate

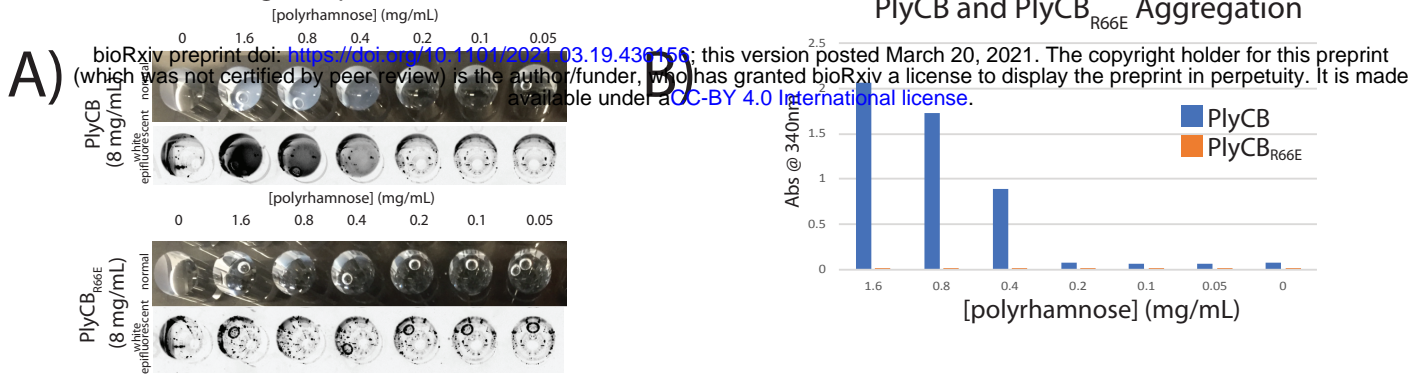

## C) Constant [PlyCB] (8 mg/mL)

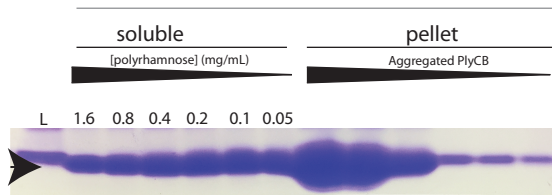

## D)

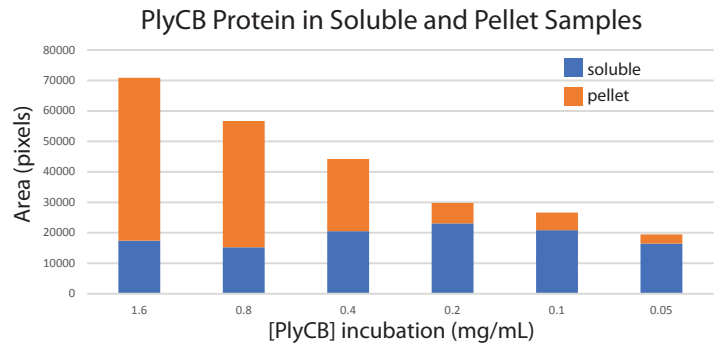

## E)

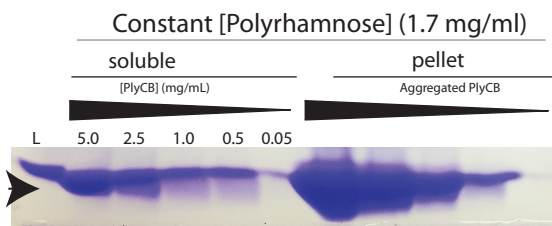

## F)

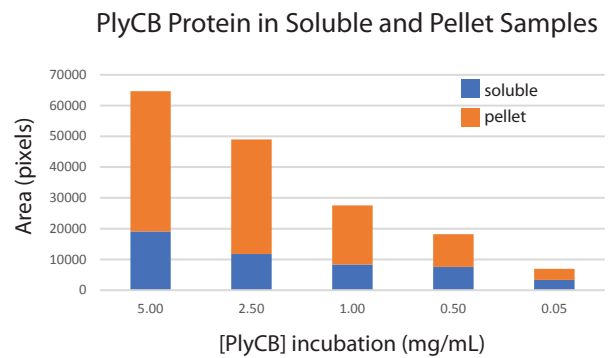

Fig 2) Precipitation studies of purified PlyCB and GAC reveal direct interaction of PlyCB with GAC. A) The PlyCB concentration is kept constant whilst the GAC concentration is varied. Visible precipitate forms at the higher concentrations. B) The precipitate level is measured spectrophotometrically at 340 nm and compared to the mutant PlyCB<sub>R66E</sub>, which does not bind the GAC. C) Coomassie stained and D) densitometry analysis of PlyCB protein from the supernatant fraction and aggregates (pellets). E, F) The same dose dependency is observed when the PlyCB concentration is varied. Arrowhead depicts PlyCB protein (8 kDa).



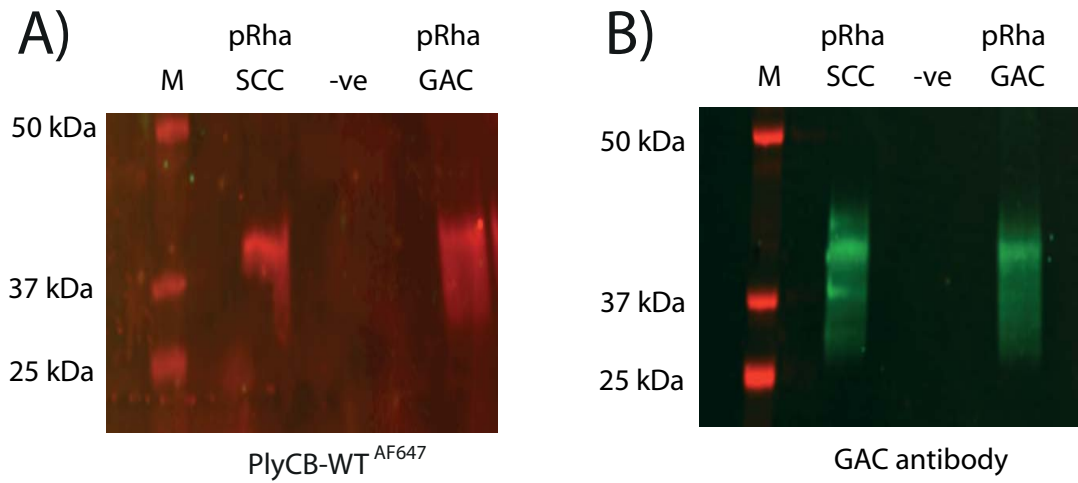

Fig 3)

Representation of immunoblot analysis of the cell lysate of *E. coli* expressing the SCC and GAC pRha and carrying an empty control plasmid (-ve). A) Blot was incubated with PlyCB-Alexa Fluor® 647 (PlyCB-WT-AF647). B) Probing the same samples with the GAC antibodies confirms the presence of GAC in the bands. Molecular mass markers are given in kDa.

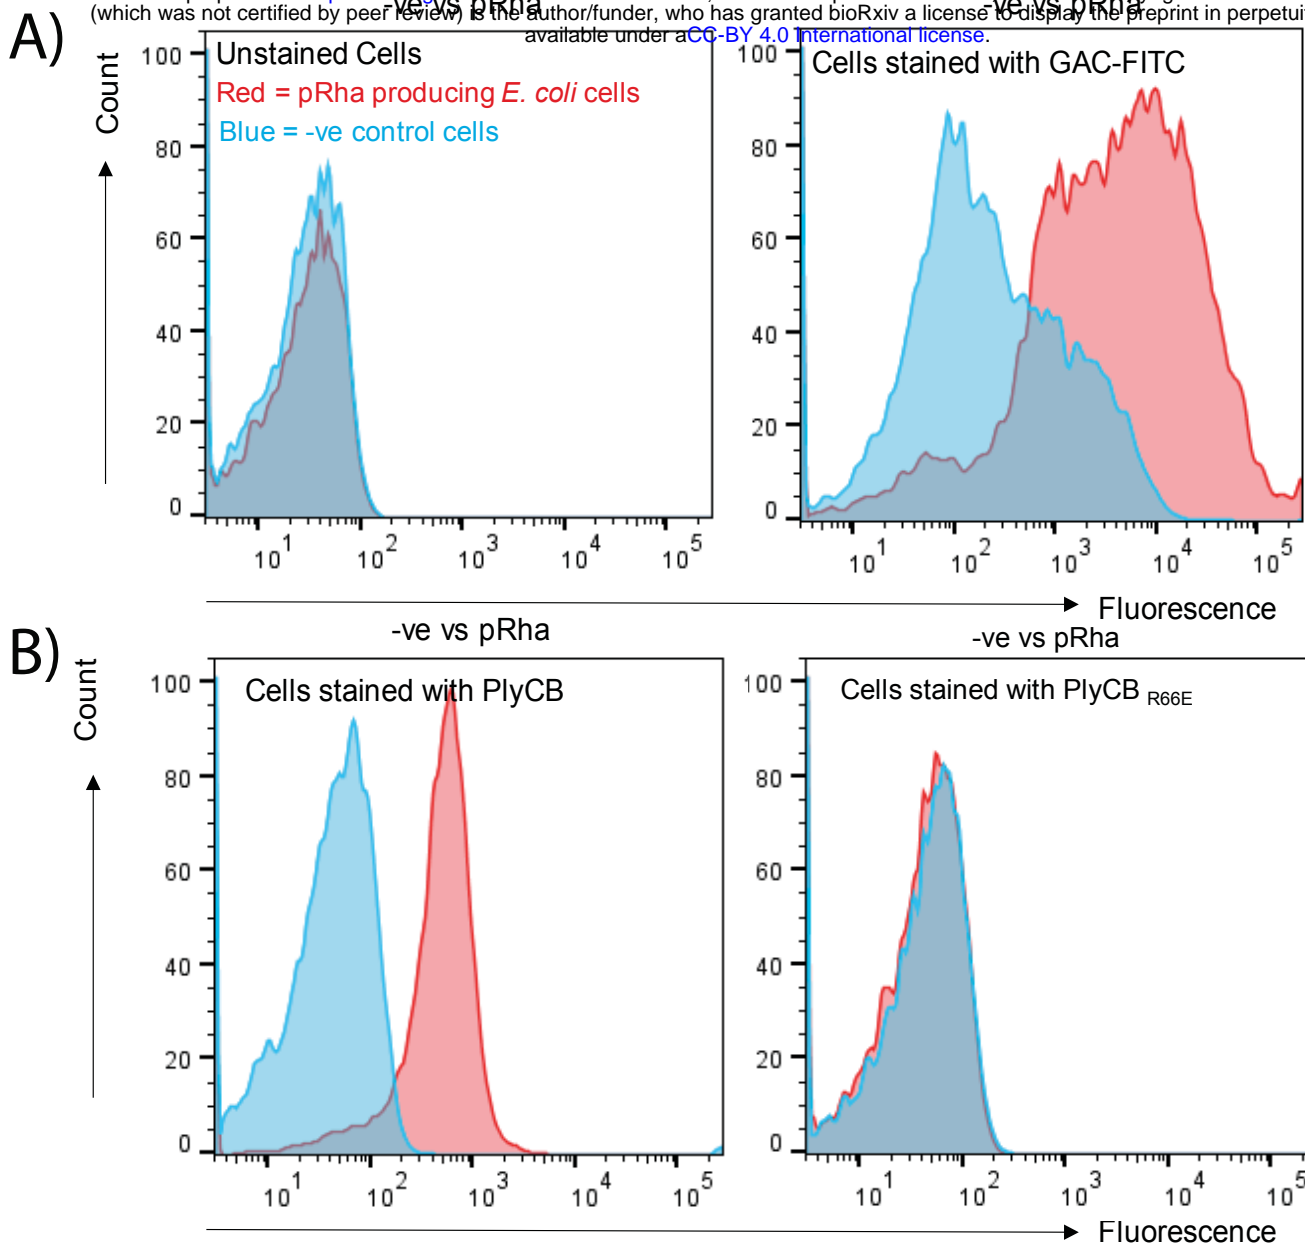

Fig 4)

PlyCB binding to *E. coli* cells were investigated by flow cytometry after labelling with PlyCB<sub>WT</sub><sup>AF647</sup> and PlyCB<sub>R66E</sub><sup>AF645</sup> mutant proteins. Blue: -ve control cells without pRha. Red: pRha producing *E. coli* cells. Representative histograms are shown. A) Left panel: unstained cells. Right panel: The anti-GAC antibodies (GAC-FITC) were used as a positive control to label the *E. coli* cells producing pRha. The antibodies do not bind to the *E. coli* cells carrying an empty plasmid (-ve). B) Left panel: PlyCB<sub>WT</sub><sup>AF647</sup> binds to the *E. coli* cells producing pRha, but not to the *E. coli* cells carrying an empty plasmid (-ve). Right panel: PlyCB<sub>R66E</sub><sup>AF645</sup> does not binds to the *E. coli* cells producing pRha.



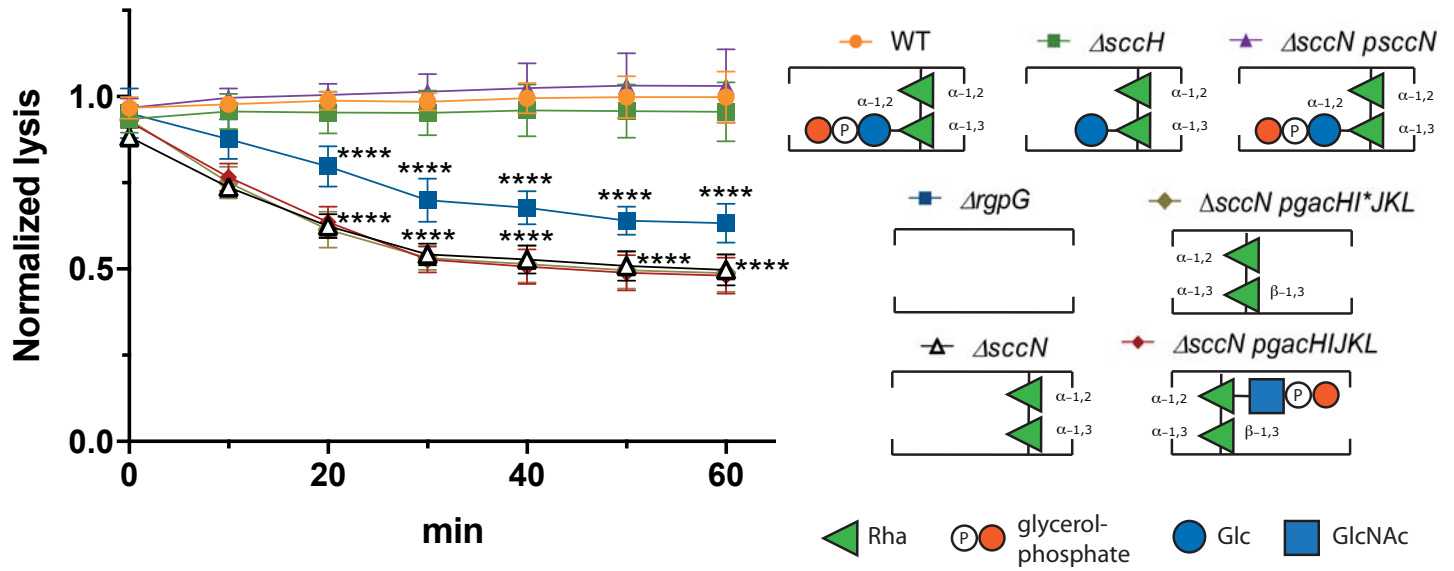

Fig 5)

The PlyC-mediated lysis of sacculi purified from *S. mutans* strains. The lysis was monitored after 10, 20, 30, 40, 50 and 60 min as a decrease in  $OD_{600}$ . Results are presented as a fold change in  $OD_{600}$  of the sacculi incubated with PlyC vs. the sacculi incubated without PlyC. Data points and error bars represent mean values of four biological replicates and standard deviation, respectively. P-values were determined by two-way ANOVA with Dunnett's multiple comparisons test.

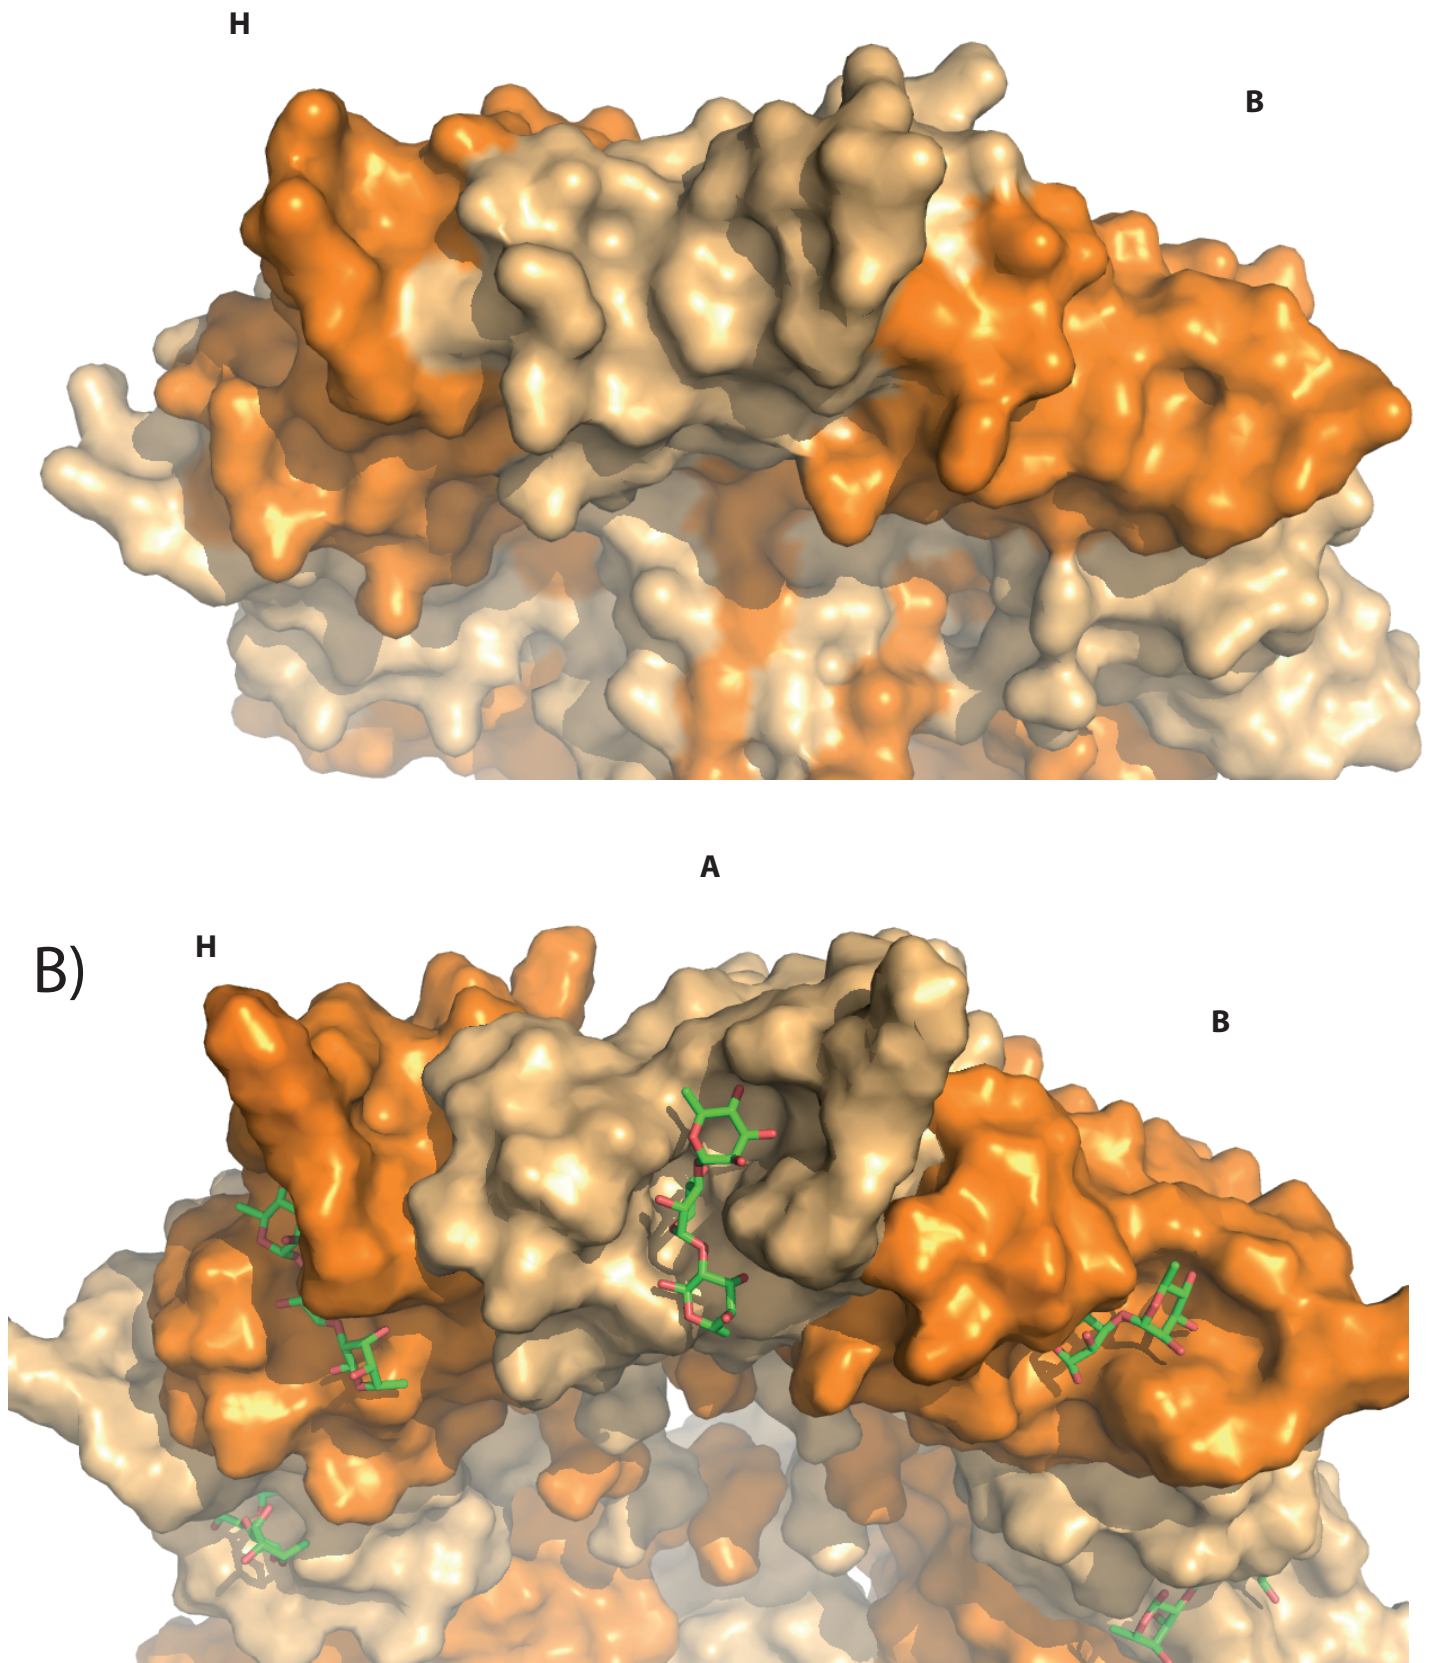

Fig 6)  
Bottom view of the PlyCB protein structures in surface representation. The octameric PlyCB structure with brown A, C, E, G and orange B, D, F, H monomers. A) WT (GH and CHAP domain omitted, 4f87.pdb) B) WT after MD with docked tri-rhamnose. The MD simulations have revealed a novel pocket that could accommodate the binding of short rhamnose-polysaccharides.

A)

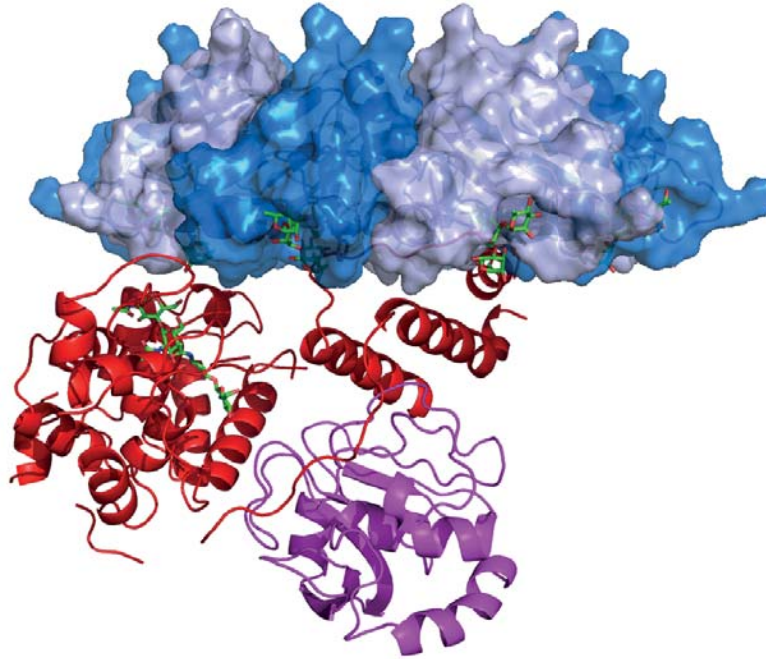

B)

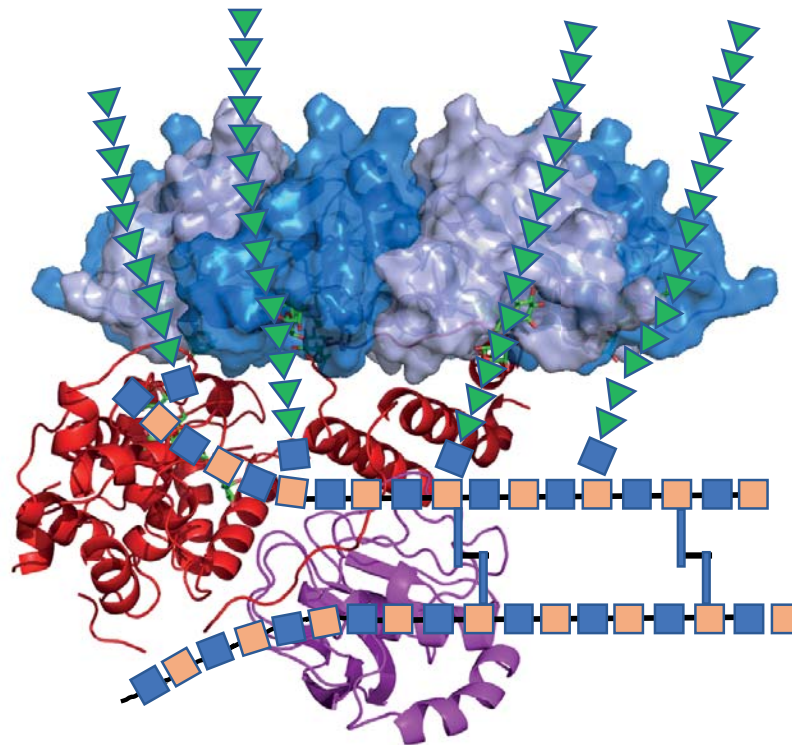

Fig 7)

A schematic model of the proposed PlyC binding to the streptococcal cell wall. A) PlyC in the complex with docked PG tetra-saccharide in the GH domain (red) and polyrhamnose tri-saccharides in PlyCB subunits. B) A schematic model showing PlyC binding to peptidoglycan and polyrhamnose. Sugars are drawn to scale, with green triangles (rhamnose), blue square (GlcNAc) and beige square (MurNAc). Proposed PlyC activity: The EAD cleaves the PG peptide to open up the PG backbones that subsequently enter the GH domain (red) for PG cleavage.
